# Does the Diffusion Tensor Model Predict the Neurite Distribution of Cerebral Cortical Gray Matter? – Cortical DTI-NODDI

## Authors:

Hikaru Fukutomi<sup>1,2</sup>, Matthew F. Glasser<sup>3,4</sup>, Katsutoshi Murata<sup>5</sup>, Thai Akasaka<sup>2</sup>, Koji Fujimoto<sup>2</sup>, Takayuki Yamamoto<sup>2</sup>, Joonas A. Autio<sup>1</sup>, Tomohisa Okada<sup>2</sup>, Kaori Togashi<sup>2</sup>, Hui Zhang<sup>6</sup>, David C. Van Essen<sup>3</sup>, Takuya Hayashi<sup>1,7</sup>

## Affiliations:

<sup>1</sup>Laboratory for Brain Connectomics Imaging, RIKEN Center for Biosystems Dynamics Research, Kobe, Japan

<sup>2</sup>Department of Diagnostic Imaging and Nuclear Medicine, Kyoto University Graduate School of Medicine, Kyoto Japan

<sup>3</sup>Department of Neuroscience, Washington University School of Medicine, St. Louis, MO, USA

<sup>4</sup>Department of Radiology, Washington University School of Medicine, St. Louis, MO, USA

<sup>5</sup>Siemens Healthcare K.K. Japan

<sup>6</sup>Centre for Medical Image Computing and Department of Computer Science, University College London, UK

<sup>7</sup>RIKEN Compass to Healthy Life Research Complex Program, Kobe, Japan

## Corresponding author

Takuya Hayashi, MD, PhD

Team Leader

Laboratory for Brain Connectomics Imaging

RIKEN Center for Biosystems Dynamics Research

6-7-3 Minatojima-minamimachi, Chuo-ku, Kobe 650-0047, Japan

Tel: 81-78-304-7140

Fax: 81-78-304-7141

E-mail: [takuya.hayashi@riken.jp](mailto:takuya.hayashi@riken.jp)

## Key words

neurite density, orientation dispersion, cortical mapping, diffusion tensor imaging, NODDI,

1 **Abstract**

2 Diffusion tensor imaging (DTI) has been widely used in human neuroimaging, but its measures are  
3 poorly linked to neurobiological features in the gray matter, primarily due to the complexity and  
4 heterogeneity of gray matter. Previously, mean diffusivity of DTI in the cortical gray matter was  
5 shown to correlate highly with an index of neurites estimated by a recently proposed model, neurite  
6 orientation dispersion and density imaging (NODDI). NODDI explicitly models neurites and has  
7 been histologically validated. However, the generalizability of the relationship between DTI and  
8 NODDI has yet to be fully clarified. Here, we evaluate whether and how DTI can predict the cortical  
9 neurite metrics of NODDI, neurite density index (NDI) and orientation dispersion index (ODI). We  
10 generated a mathematical relationship between DTI and NODDI by assuming a negligible  
11 compartment of cerebro-spinal fluid (CSF) (DTI-NODDI); we predicted and validated quantitative  
12 values of the NDI and ODI by comparing estimates derived from DTI to the original NODDI using  
13 456 subjects' data in the Human Connectome Project (HCP). Simulations for the error of  
14 DTI-NODDI were also performed to evaluate the impact of neglecting the CSF compartment and to  
15 characterize the effects of partial volume and heterogeneity of CSF and b-shell scheme of diffusion  
16 data. For both NDI and ODI, cortical distributions of DTI-NODDI closely resembled those in the  
17 original NODDI model, particularly when using data that included the highest diffusion weighting  
18 (b-value=3000). The DTI-NODDI values in cortical regions of interest were slightly overestimated  
19 but highly correlated with the original. Simulations confirmed that analyzing with high b-value data  
20 minimized error propagation from heterogeneity and partial voluming of CSF, although values were  
21 consistently overestimated. These findings suggest that DTI can predict the variance of NODDI  
22 metrics and hence neurite distribution of cortical gray matter when using high b-value diffusion MRI  
23 data.

24

25

## 1 **1. Introduction**

2 The diffusion motion of water molecules in brain tissue is affected by the local microarchitecture,  
3 including axons, dendrites and cell bodies (Moseley et al., 1990). Diffusion tensor imaging (DTI) is a  
4 well established model that describes Gaussian properties of diffusion motion in a fibrous structure  
5 like brain white matter (Basser et al., 1994a, 1994b) and is widely used for inferring the  
6 microstructural changes related to plasticity and diseases (for review, Johansen-Berg and Behrens,  
7 2013). In most cases, summary parameters of DTI, fractional anisotropy (FA) and mean diffusivity  
8 (MD), have been studied, however, these parameters have not been shown to be specific to  
9 underlying microstructural features of axons and dendrites (collectively referred to as neurites) and  
10 are often sensitive to tissue compartments other than neurites (Pierpaoli and Basser, 1996). DTI  
11 analyses often fail to capture the specifically varying features of underlying microstructure; e.g. a  
12 decrease in FA may be caused by an increase in the dispersion of neurite orientation, a decrease in  
13 neurite density, or another tissue microstructural change (Jones and Cercignani, 2010; Pierpaoli et al.,  
14 1996; Pierpaoli and Basser, 1996). In particular, using DTI in gray matter tissue is thought to be  
15 inaccurate due to the complexity and heterogeneity of gray matter diffusion (Assaf, 2018). Despite  
16 that, recent DTI studies suggest potential microstructural changes in the gray matter of patients with  
17 multiple sclerosis and Alzheimer's disease (Calabrese et al., 2011; Eustache et al., 2016; Henf et al.,  
18 2018), though the findings are yet to be associated with specific pathological changes. Therefore, it  
19 is worth addressing the issue of how closely DTI measures are associated with the underlying  
20 complexity of the gray matter microstructure, particularly those related to neurite properties.

21  
22 One recent advance for estimating the microstructural complexity of brain tissue using diffusion  
23 MRI (dMRI) is the Neurite Orientation Dispersion and Density Imaging (NODDI) (Zhang et al.,  
24 2012). NODDI models dMRI signals by combining three tissue compartments: neurites,  
25 extra-neurites, and cerebro-spinal fluid (CSF), each with different properties of diffusion motion, and  
26 enables in vivo estimation of a neurite density index (NDI) and an orientation dispersion index (ODI),  
27 as well as a volume fraction of isotropic diffusion ( $V_{iso}$ ). NODDI requires dMRI data to be scanned  
28 with relatively higher number of diffusion gradient directions (e.g. >90 directions) and b-values (e.g.  
29  $b=700$  and  $2000 \text{ sec/mm}^2$ ) as compared with DTI (Zhang et al., 2012). The NDI estimates the volume  
30 fraction of neurites, including both axons and dendrites, whereas the ODI estimates the variability of  
31 neurite orientation: ranging from 0 (all parallel) to 1 (isotropically randomly oriented). Variation of  
32 NODDI estimates in white matter have been related to aging (Billiet et al., 2015; Chang et al., 2015;  
33 Eaton-Rosen et al., 2015; Genc et al., 2017; Kodiweera et al., 2016; Kunz et al., 2014) and neurologic  
34 disorders (Adluru et al., 2014; Billiet et al., 2014; Timmers et al., 2015). Gray matter changes jn

1 NODDI were also reported in patients with IFN- $\alpha$ -induced fatigue (Dowell et al., 2017), Wilson's  
2 disease (Song et al., 2017), cortical dysplasia (Winston et al., 2014), aging (Nazeri et al., 2015), and  
3 schizophrenia (Nazeri et al., 2016). Importantly, histological studies suggest that NDI is correlated  
4 with myelin (Grussu et al., 2017) and that ODI is associated with complexity of fiber orientation  
5 (Grussu et al., 2017; Sato et al., 2017; Schilling et al., 2018).

6  
7 We recently optimized NODDI for cortical gray matter (Fukutomi et al., 2018), finding that the NDI  
8 is closely related to cortical myelin, as estimated by the ratio of T1w to T2w MRI images (Glasser  
9 and Van Essen, 2011) and that ODI is associated with cortical cytoarchitecture as mapped by Von  
10 Economo and Koskinas (Triarhou, 2009; von Economo and Koskinas, 1925). In addition, we found  
11 strong relationships between NODDI and DTI parameters in the cortex, in particular, NDI and 1/MD  
12 were very highly correlated ( $R=0.97$ ) (Fukutomi et al., 2018). We proposed (Fukutomi et al., 2018)  
13 that this strong correlation reflects a recently derived mathematical relation between NODDI and  
14 DTI parameters (Edwards et al., 2017) (Lampinen et al., 2017). This relationship relies on the  
15 assumption that CSF compartment ( $V_{iso}$ ) is negligible in the tissue (Edwards et al., 2017, Lampinen  
16 et al., 2017). In support of this assumption for cortical gray matter, the estimated  $V_{iso}$  in the cortex,  
17 particularly when mapped on the surface, is relatively small compared to that in the white matter  
18 (Fukutomi et al., 2018). In contrast, white matter may be a major site for convective flow of CSF  
19 (Rosenberg et al., 1980).

20  
21 In the present study, we evaluate whether NODDI parameters in cortical gray matter can be  
22 predicted from DTI parameters utilizing a mathematical relationship between the two models. We  
23 present a method that estimates cortical maps of NDI and ODI of NODDI based on DTI values  
24 (cortical DTI-NODDI), which is computationally less expensive than the original NODDI. We  
25 used Human Connectome Project (HCP) data that had already preprocessed. Since the estimated size  
26 of the CSF compartment may depend on b-value and spatial resolution, we evaluated the quantitative  
27 accuracy of the surface distribution of NODDI measures using different b-values of dMRI. We  
28 additionally performed simulation analysis in terms of b-value, proportion of CSF signal, and  
29 random noise in data.

## 30 31 **2. Materials and Methods**

32 We first describe the models and formulations of the original NODDI and the DTI-based estimation  
33 of NODDI (DTI-NODDI). Based on the formulation, we evaluated the DTI-NODDI model for  
34 cortical neurite estimation using *in vivo* MRI data of the HCP (<https://www.humanconnectome.org/>).

1 We used publicly available data from 456 healthy subjects (aged 22-35 years) to test whether  
2 DTI-NODDI can provide as accurate neurite maps as those from the original NODDI model. In  
3 particular, dMRI datasets with different b-shell structures were analyzed to investigate how the  
4 b-shell scheme affects neurite estimations. We also performed simulation analyses to clarify how the  
5 b-shell scheme dependency of DTI-NODDI is associated with several error sources such as CSF  
6 signals in dMRI data, partial volume effects, and random noise. The reproducibility of DTI-NODDI  
7 was also assessed using test-retest HCP data. Data analyses were performed at RIKEN, and the use  
8 of HCP data in this study was approved by the institutional ethical committee (KOBE-IRB-16-24).

9

## 10 2.1 Models

### 11 2.1.1 *The original NODDI Model*

12 The NODDI method models brain microarchitecture in three compartments that have different  
13 properties of water molecules' diffusion motion: the intracellular compartment (restricted diffusion  
14 bounded by neurites), the extracellular compartment (outside of neurites and potentially including  
15 glial cells), and the CSF compartment (Zhang et al., 2012). The intracellular compartment is modeled  
16 as a set of sticks, i.e., cylinders of zero radius in which diffusion of water is highly restricted in  
17 directions perpendicular to neurites and unhindered along them (Behrens et al., 2003; Panagiotaki et  
18 al., 2012; Sotiropoulos et al., 2012). The orientation distribution of these sticks is modeled with a  
19 Watson distribution, because it is the simplest distribution that can capture the dispersion in  
20 orientations (Mardia and Jupp, 1990). The extracellular compartment is modeled with anisotropic  
21 Gaussian diffusion parallel to the main direction. The CSF compartment is modeled as isotropic  
22 Gaussian diffusion. The full normalized signal  $A$  is thus written as:

23

$$24 A = (1 - V_{\text{iso}}) \{ V_{\text{ic}} A_{\text{ic}} + (1 - V_{\text{ic}}) A_{\text{ec}} \} + V_{\text{iso}} A_{\text{iso}}, \quad (1)$$

25

26 where  $A_{\text{iso}}$  and  $V_{\text{iso}}$  are the normalized signal and volume fraction of the CSF compartment; the  
27 volume fraction of non-CSF compartment ( $1 - V_{\text{iso}}$ ) is further divided into intracellular compartment  
28 ( $V_{\text{ic}}$ ) (=NDI) and extracellular compartment ( $1 - V_{\text{ic}}$ );  $A_{\text{ic}}$  and  $A_{\text{ec}}$  is the normalized signal of the  
29 intracellular and extracellular compartments, respectively. Additional NODDI parameters are  
30 isotropic diffusivity ( $d_{\text{iso}}$ ) and intrinsic free diffusivity ( $d_{\parallel}$ ), i.e., the diffusivity parallel to neurites.  
31 Detailed expressions of mathematical equations and derivation are described in the Appendix, and  
32 these formulations were used for the simulation study described in Section 2.3.

33

### 34 2.1.2 *The DTI-based estimation of NODDI (DTI-NODDI)*

1 The equations that relate NODDI to DTI models are detailed in previous studies (Edwards et al.,  
2 2017; Lampinen et al., 2017). Briefly, the NDI and the orientation parameter ( $\tau$ ) can be expressed by  
3 using DTI measures such as MD and FA in the following equations, assuming that the CSF  
4 compartment ( $V_{iso}$ ) is negligible:

$$5 \quad NDI = 1 - \sqrt{\frac{1}{2} \left( \frac{3MD}{d_{//}} - 1 \right)} \quad (2)$$

$$6 \quad \tau = \frac{1}{3} \left( 1 + \frac{4MD \cdot FA}{|d_{//} - MD| \sqrt{3 - 2FA^2}} \right), \quad (3)$$

7 where  $d_{//}$  is a constant for intrinsic diffusivity assumed in the NODDI model. The orientation  
8 dispersion index (ODI) is calculated using the following formulas:

$$9 \quad \tau = \frac{1}{\sqrt{\pi\kappa} \exp(-\kappa) \operatorname{erfi}(\sqrt{\kappa})} - \frac{1}{2\kappa} \quad (4)$$

$$10 \quad ODI = \frac{2}{\pi} \arctan \left( \frac{1}{\kappa} \right), \quad (5)$$

11  
12 where *erfi* is the imaginary error function and *arctan* is the arctangent. Based on these equations,  
13 once we have DTI measures such as FA and MD, 1) NDI can be analytically estimated from MD  
14 using formula (2) ( $NDI_{DTI}$ ) by using an assumed value of  $d_{//}$ , 2)  $\tau$  can be calculated using formula (3)  
15 and values of MD and FA, 3)  $\kappa$  can be estimated using formula (4) by using a look-up-table and a  
16 value of  $\tau$  calculated at the previous step, and 4)  $ODI_{DTI}$  was calculated using the formula (5) and  $\kappa$ .  
17 Plotting values of DTI and predicted NODDI makes their relationship much clearer (Fig. 1). Using  
18  $d_{//} = 1.1 \times 10^{-3} \text{ mm}^2/\text{s}$  (optimized for gray matter (Fukutomi et al., 2018)) and for an expected range of  
19 MD in the cortex ( $5$  to  $6 \times 10^{-4} \text{ mm}^2/\text{s}$ , see Fig. 4B in (Fukutomi et al., 2018)), we found that the  
20 value of NDI is predicted by a monotonically increasing function of the inverse of MD (Fig. 1A) and  
21 that ODI is a monotonically decreasing function of MD but also has a floor effect based on the value  
22 of FA (Fig. 1B).  
23  
24  
25

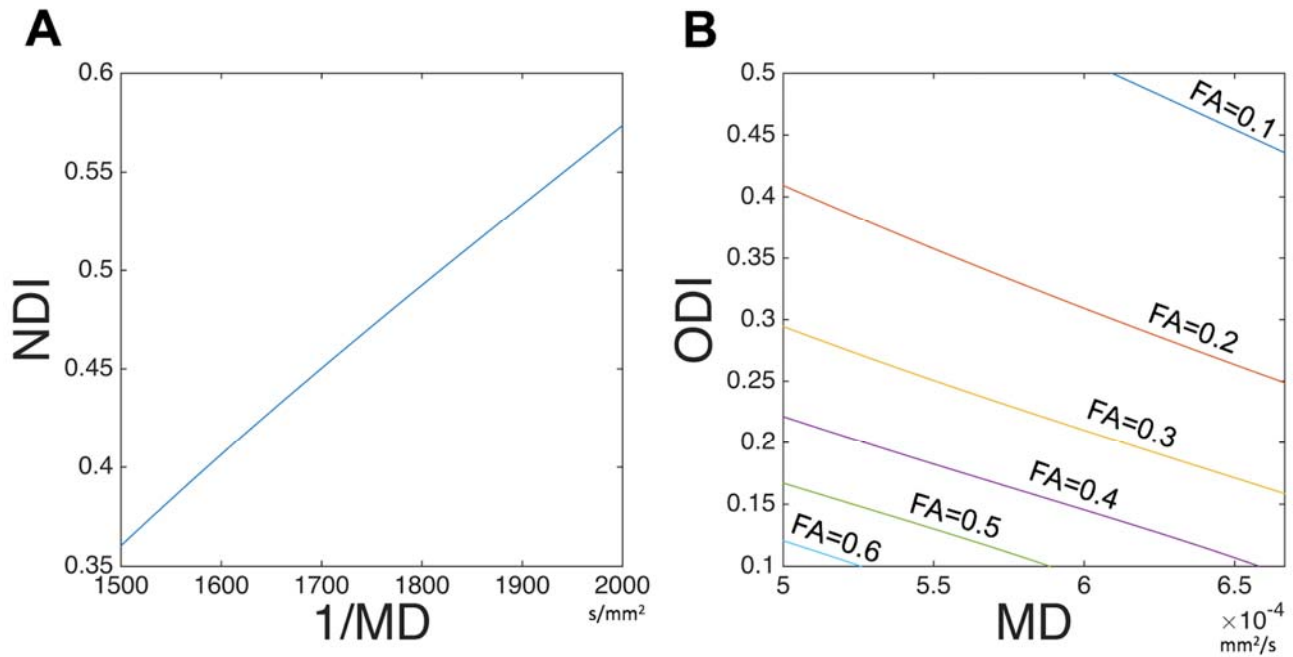

1

2 **Figure 1.** Relationships of values between NODDI and DTI based on DTI-NODDI model. The  
3 equations for DTI-NODDI (Eq. 2-5) and  $d_{//}=1.1\times 10^{-3}$  mm<sup>2</sup>/s (optimized for gray matter) were used  
4 to simulate relationships between **A)** Neurite density index (NDI) vs inversed mean diffusivity  
5 (1/MD), over the range of MD= 1500 to 2000 s/mm<sup>2</sup>, and **B)** orientation dispersion index (ODI) vs  
6 MD when fractional anisotropy (FA) ranged from 0.1 to 0.6. Data at <https://balsa.wustl.edu/r519>

7

8 2.2 Cortical DTI-NODDI using in vivo MRI data

9 2.2.1 Subjects and dMRI datasets

10 We used the ‘S500 Release Subjects’ dataset from the publicly available HCP dataset, including  
11 high-resolution structural images (0.7-mm isotropic T1w and T2w images, (Glasser et al., 2013) and  
12 dMRI data (1.25-mm isotropic resolution) (Sotiropoulos et al., 2013). The dMRI data included 270  
13 volumes with 90 volumes for each of the three shells of b-values ( $b=1000, 2000$  and  $3000$  s/mm<sup>2</sup>) in  
14 addition to 18 non-diffusion weighted ( $b=0$  s/mm<sup>2</sup>) volumes. From this dataset, 456 healthy subjects  
15 (age, 22-35 years) scanned with a complete dataset of 270 volumes were chosen, and 49 subjects  
16 were excluded based on incomplete dMRI scans. To investigate reproducibility, 32 subjects’ retest  
17 data were used. In our previous study, NDI and the reciprocal of MD (1/MD) showed very similar  
18 surface distributions when all of the dMRI data were used, but they did not show similar

19 distributions when only a single shell of  $b=1000$  dMRI data was used (Fukutomi et al., 2018).  
20 Therefore, we hypothesized that the validity of DTI-NODDI may differ depending on the b-shell  
21 scheme of dMRI data. To address this, datasets with different b-shell schemes were used for analysis  
22 (Table 1), i.e. for each subject, seven types of b-shell datasets were derived from dMRI data as  
23 follows: three one-shell datasets using  $b=0$  volume and any one of  $b=1000, 2000$ , or  $3000$  volume;  
24 three two-shell datasets using  $b=0$  images and any two of  $b=1000, 2000$ , or  $3000$  volume; and a



1 three-shell dataset using all images.

2

3 **Table 1** The table lists abbreviations of b-shell datasets used in the main text and corresponding  
4 datasets of dMRI in different b-shell schemes. The numbers in parentheses indicate the number of b0  
5 volumes with repeatedly obtained for b=0 volume or diffusion weighted directions with different  
6 b-vectors (or directions of diffusion-weighted gradient) for each of the b=1000, 2000 and 3000  
7 shells.

| Abbreviations of b-shell datasets | Datasets of non-diffusion weighted (b=0) and diffusion-weighted MRI volumes (b=1000,2000 and 3000) |
|-----------------------------------|----------------------------------------------------------------------------------------------------|
| b <sub>1000</sub>                 | b=0 (18), b=1000 (90)                                                                              |
| b <sub>2000</sub>                 | b=0 (18), b=2000 (90)                                                                              |
| b <sub>3000</sub>                 | b=0 (18), b=3000 (90)                                                                              |
| b <sub>1000-2000</sub>            | b=0 (18), b=1000 (90), b=2000 (90)                                                                 |
| b <sub>1000-3000</sub>            | b=0 (18), b=1000 (90), b=3000 (90)                                                                 |
| b <sub>2000-3000</sub>            | b=0 (18), b=2000 (90), b=3000 (90)                                                                 |
| b <sub>All</sub>                  | b=0 (18), b=1000 (90), b=2000 (90), b=3000 (90)                                                    |

8

### 9 2.2.2 Calculation of the cortical surface map of NODDI and DTI-NODDI parameters

10 The DTI estimates (FA and MD) were calculated using each dataset of dMRI and the dtifit diffusion  
11 tensor modeling tool in Functional Magnetic Resonance Imaging of the Brain Software Library  
12 (FSL) 5.09 (<http://www.fmrib.ox.ac.uk/fsl>). To compare DTI-NODDI with the original NODDI, the  
13 diffusion data were also fitted to the NODDI model using the optimized value of  $d_{//}$  and Accelerated  
14 Microstructure Imaging via Convex Optimization (AMICO) 1.0 (Daducci et al., 2015), which  
15 re-formulates the original NODDI model as a linear system and shortens the calculation time. The  
16 value of  $d_{//}$  was optimized for the cerebral cortex ( $1.1 \times 10^{-3} \text{ mm}^2/\text{s}$ ) from the original setting value  
17 ( $1.7 \times 10^{-3} \text{ mm}^2/\text{s}$ ) (Fukutomi et al., 2018), because we are interested in the cerebral cortical gray  
18 matter. We used default values of regularization ( $\lambda=0.001$  and  $\gamma=0.5$ ) for AMICO.

19

20 The parameters of the original NODDI model (NDI and  $\kappa$ ) and the DTI model (FA and MD) were  
21 mapped onto the cortical surface, as described previously (Fukutomi et al., 2018). Briefly, the  
22 algorithm for surface mapping identifies cortical ribbon voxels within a cylinder orthogonal to the  
23 local surface for each mid-thickness surface vertex on the native mesh and weights them using a  
24 Gaussian function (FWHM=  $\sim 4$  mm,  $\sigma=5/3$  mm), which reduces the contribution of voxels that  
25 contain substantial partial volumes of CSF or white matter (Glasser and Van Essen 2011 Journal of  
26 Neuroscience). The  $\text{ODI}_{\text{ORIG}}$  was calculated using the surface metric of  $\kappa$  and equation (5).  
27 Subsequently,  $\text{NDI}_{\text{DTI}}$  and  $\text{ODI}_{\text{DTI}}$  maps were calculated from FA and MD maps using in-house script



1 of DTI-NODDI written by MATLAB (R2013a) (<http://www.mathworks.com/>). The surface maps  
2 were resampled using MSMAll surface registration (Glasser et al., 2016; Robinson et al., 2014, 2018)  
3 and onto the 32k group average surface mesh. For surface-based analysis, we used Connectome  
4 Workbench (<https://github.com/Washington-University/workbench>, Marcus et al., 2013). The tool  
5 for DTI-NODDI and NODDI surface mapping used in this manuscript is available from  
6 NoddiSurfaceMapping (<https://github.com/RIKEN-BCIL/NoddiSurfaceMapping>). All calculations  
7 were performed using a workstation including a 32 core CPU: Intel(R) Xeon(R) CPU E5-2687W v2  
8 @ 3.40GHz, Memory: 128GB, DIMM DDR3 1866 MHz (0.5 ns) and operation system: Ubuntu  
9 14.04.

10

### 11 2.2.3 Statistical analysis

12 Surface maps of  $NDI_{ORIG}$ ,  $ODI_{ORIG}$ ,  $V_{iso}$ ,  $NDI_{DTI}$  and  $ODI_{DTI}$  using each dataset were averaged  
13 across subjects and parcellated using the HCP's multi-modal cortical parcellation (HCP\_MMP1.0  
14 210P MPM version) (Glasser et al., 2016). The mean value of each measure for each of the 180  
15 parcels per hemisphere was calculated.  $NDI_{ORIG}$  and  $ODI_{ORIG}$  calculated using all the dMRI data  
16 were considered 'a gold standard' reference. To investigate the linear relationship between  
17 DTI-NODDI and the original NODDI, the correlations between each parcellated surface map  
18 ( $NDI_{ORIG}$ ,  $ODI_{ORIG}$ ,  $NDI_{DTI}$  and  $ODI_{DTI}$ ) and the reference in each subject were calculated using  
19 Pearson correlation analysis. The linear regression analysis was also performed using the reference  
20 as independent variable and DTI-NODDI as predictors. The mean of the correlation coefficient  
21 across subjects was computed after using the Fisher Z transformation. To investigate whether the  
22 DTI-NODDI values are biased, Bland-Altman analysis was performed in each dataset (Bland and  
23 Altman, 1986). Briefly, Bland-Altman analysis is a method to confirm the presence or absence and  
24 degree of systematic bias visually by creating a scatter diagram (Bland-Altman plot), which is  
25 created by plotting the difference between two pairs of measured values on the y axis and the  
26 average value of the two measured values on the x axis. The reproducibility of each parcel of each  
27 estimate was investigated using 32 subjects' test-retest data using the intra-class correlation  
28 coefficient (ICC) and the coefficient of reliability (CR) (Bland and Altman, 2003; Shrout and Fleiss,  
29 1979; Vaz et al., 2013). Subsequently, the median value of ICC and CR in all parcels was defined as  
30 the representative value of each estimate.

31

32 Since the quality of the NODDI estimates depends on the image quality and preprocessing, we  
33 estimated the practical quality by the temporal signal-to-noise ratio (tSNR) of preprocessed  $b=0$   
34 volumes and removed surface parcels with  $tSNR < 17$  from the analysis. The cutoff was determined

1 empirically in our previous study (Fukutomi et al., 2018).

2

### 3 2.3 Simulation

4 Since correlations and biases between DTI-NODDI and the original NODDI in HCP data were  
5 particularly dependent on the presence of high b-value data ( $b=3000 \text{ s/mm}^2$ ) in the datasets (see  
6 section 3.1), simulations were performed to clarify whether potential sources of error can explain our  
7 findings of cortical neurite distributions with DTI-NODDI. A potential source of error was the  
8 amount of CSF compartment ( $V_{\text{iso}}$ ), which was assumed to be zero in the DTI-NODDI model. The  
9 size of the CSF compartment in a cortical voxel is the sum of CSF compartment in the cortical tissue  
10 and the partial volume of extra-tissue CSF because of the thin cortical ribbon (average 2.6mm,  
11 minimum 1.6mm) and the limited spatial resolution of the dMRI data (1.25mm iso-voxel in HCP  
12 data) (see also Supplementary text, Fig. S1). The effect of partial voluming may be different across  
13 cortical voxels depending on the locations of the voxels within the complex geometry of the cortical  
14 ribbon. The various levels of partial volume effects can cause heterogeneity of accuracy in each  
15 cortical voxel that could result in errors and biases when mapped on the cortical surface. Particularly,  
16 the effect of heterogeneity in CSF partial volume can change the size of the error in DTI-NODDI  
17 parameters depending on b-shell scheme of dMRI data, because low b-value dMRI data may contain  
18 more CSF signal than high b-value dMRI data. Therefore, it is important to demonstrate the  
19 robustness of DTI-NODDI against errors caused by partial voluming of CSF to ensure non-biased  
20 distribution of cortical DTI-NODDI maps. Our simulation analyses addressed three potential sources  
21 of error. First, the validity of the DTI-NODDI assumption of negligible CSF was evaluated by  
22 simulating cerebral cortex that contains a small amount of CSF with little variability ( $=0.1$  in volume  
23 ratio). Second, we investigated whether heterogeneity of  $V_{\text{iso}}$  would cause errors in DTI-NODDI  
24 parameters and how the sensitivity of DTI-NODDI to the heterogeneity of  $V_{\text{iso}}$  error depends on  
25 b-shell datasets. Third, random noise in dMRI data was also investigated, because both DTI and the  
26 original NODDI model may have biases depending on SNR. Thus, we created simulation data with  
27 and without random noise in dMRI and assessed how the noise can affect bias in the measures of  
28 DTI-NODDI as compared with the assumed true values from the original NODDI model. All the  
29 simulation data were created based on the mathematical equations and derivation described in the  
30 Appendix. The details of two simulation analyses including assumed values and conditions are  
31 described below.

32

#### 33 2.3.1 Validity of the negligible CSF compartment assumption for cortical DTI-NODDI

34 Although we confirmed that CSF volume in the cortex was small (average  $V_{\text{iso}}=0.096$ ), it may not be

1 small enough to justify using DTI-NODDI, particularly when using low b-value dMRI data, which  
2 might have a significant contribution of CSF. Therefore, we investigated using a simulation analysis  
3 whether the value of  $V_{iso}$  in the cortex is small enough to use a mathematical relationship between  
4 DTI and NODDI that assumes negligible CSF for each b-shell dataset. The size of the CSF  
5 compartment ( $V_{iso}$ ) in the cortex was assumed to be homogeneous and small in a simulation analysis  
6 ( $V_{iso}=0.1$ ) since our estimated values using original NODDI were  $0.096 \pm 0.063$  (mean  $\pm$  s.d.) in  
7 cortical gray matter and  $0.21 \pm 0.097$  in the white matter (Supplementary Text and Fig. S1). Seven  
8 different combinations of b-shell datasets (same as Table 1) were created assuming following  
9 parameters as possible values within the cerebral cortex (Fukutomi et al., 2018);  $V_{iso}=0.1$ , NDI  
10 ranging from 0.1 to 0.55 and ODI ranging from 0.040 to 0.84, independently and respectively (see  
11 Table 2). To investigate linearity,  $NDI_{DTI}$  and  $ODI_{DTI}$  were correlated with the true values using the  
12 Pearson correlation analysis for each dataset. Subsequently, a Bland-Altman analysis was performed  
13 between the original NODDI model and DTI-NODDI to investigate bias in the DTI-NODDI model.  
14 In addition, to investigate the effect of random noise in DTI-NODDI, the same analyses were also  
15 performed using simulation data with added Gaussian noise to produce a SNR level of 20.

16

17 **Table 2.** Parameters and values used in simulation analysis. Note that all combinations of values of  
18 NDI and ODI were simulated.

|     |       |      |      |      |      |      |      |      |      |      |
|-----|-------|------|------|------|------|------|------|------|------|------|
| NDI | 0.1   | 0.15 | 0.2  | 0.25 | 0.3  | 0.35 | 0.4  | 0.45 | 0.5  | 0.55 |
| ODI | 0.040 | 0.11 | 0.16 | 0.30 | 0.37 | 0.47 | 0.55 | 0.61 | 0.70 | 0.84 |

19

### 20 2.3.2 Error sensitivity of cortical DTI-NODDI to heterogeneity and partial volume effects of CSF

21 Although the CSF compartment in the cortex is relatively small as compared with white matter, MRI  
22 signal in cortical voxels may have a contribution of CSF by partial volume effects and hence  
23 heterogeneity because of the limited resolution of dMRI data (1.25mm iso-voxel in HCP data). To  
24 address this, we evaluated the error sensitivity of DTI-NODDI to the heterogeneity of CSF ( $V_{iso}$ ) by  
25 systematic simulation with error propagation from  $V_{iso}$  to DTI-NODDI parameters. The simulated  
26 dMRI datasets were created as cortical gray matter voxels but with different levels of partial volume  
27 CSF. The reference parameters were fixed to  $NDI=0.25$ ,  $ODI=0.30$ , and  $V_{iso}=0.1$  because they were  
28 near the mean values estimated by cortical NODDI. The simulated dMRI datasets were created with  
29 different levels of error in  $V_{iso}$  at -0.1 (i.e. assumed value of  $V_{iso}=0$ ), 0 (i.e.  $V_{iso}=0.1$ ) and from +0.1  
30 to +0.9 (i.e.  $V_{iso}$  from 0.2 to 1.0) with an interval of 0.1. For each simulation dataset,  $NDI_{DTI}$  and  
31  $ODI_{DTI}$  were calculated by DTI-NODDI, and then, %error in DTI-NODDI was calculated as the ratio  
32 of the estimated values to those without error in  $V_{iso}$ . The same analysis was also performed using

1 simulated data with added Gaussian noise to an SNR level of 20.

2

### 3 **3. Results**

#### 4 3.1 Cortical DTI-NODDI using in vivo dMRI data

##### 5 3.1.1 *Reliability of DTI-NODDI as compared with the original NODDI*

6 When the three-shell dataset ( $b_{All}$ ) in 456 subjects of HCP data were used in the original NODDI, the  
7 cortical map of neurite density ( $NDI_{ORIG}$ ) showed high intensity in the primary sensorimotor, visual,  
8 auditory cortices as well as the middle temporal (MT) area (Fig. 2 A), while  $ODI_{ORIG}$  showed high  
9 intensity in the primary sensory, visual and auditory areas (Fig. 3 A), as we reported previously  
10 (Fukutomi et al., 2018). Moreover, consistent with our previous study (Fukutomi et al., 2018), the  
11 cortical distribution of the  $NDI_{ORIG}$  was quite similar to that of the myelin map based on the T1w and  
12 T2w images, while the distribution of  $ODI_{ORIG}$  showed high contrast in the ‘granular cortex’ of von  
13 Economo and Koskinas (von Economo and Koskinas, 1925), where cortical thickness is low and  
14 both radial and horizontal fibers are intermingled (Fukutomi et al., 2018).

15

16 Interestingly, when DTI-NODDI was applied to the same three-shell dataset ( $b_{All}$ ), similar cortical  
17 distributions of NDI and ODI ( $NDI_{DTI}$ ,  $ODI_{DTI}$ ) were obtained in average surface maps across all  
18 subjects (Fig. 2 B for  $NDI_{DTI}$  and Fig. 3 B for  $ODI_{DTI}$ ). The pattern was also evident in single subject  
19 surface maps (Fig. S2 B for  $NDI_{DTI}$  and S3 B for  $ODI_{DTI}$ ). The correlation analysis for the  
20 parcellated data (see Methods & Materials 2.2.3) showed that correlation coefficients between the  
21 DTI-NODDI and original NODDI were extremely high in group average maps for both metrics  
22 (NDI:  $R=0.97$ , ODI:  $R=0.94$ ,  $p<0.00001$ ), as well as individual maps (NDI:  $R=0.92$ , ODI:  $R=0.89$ ,  
23  $p<0.00001$ ) (Fig. 4) although the values were quite different between two methods. The regression  
24 equations were as follows; NDI:  $Y = 0.81X - 0.11$ , ODI:  $Y = 1.4X - 0.31$ .

25

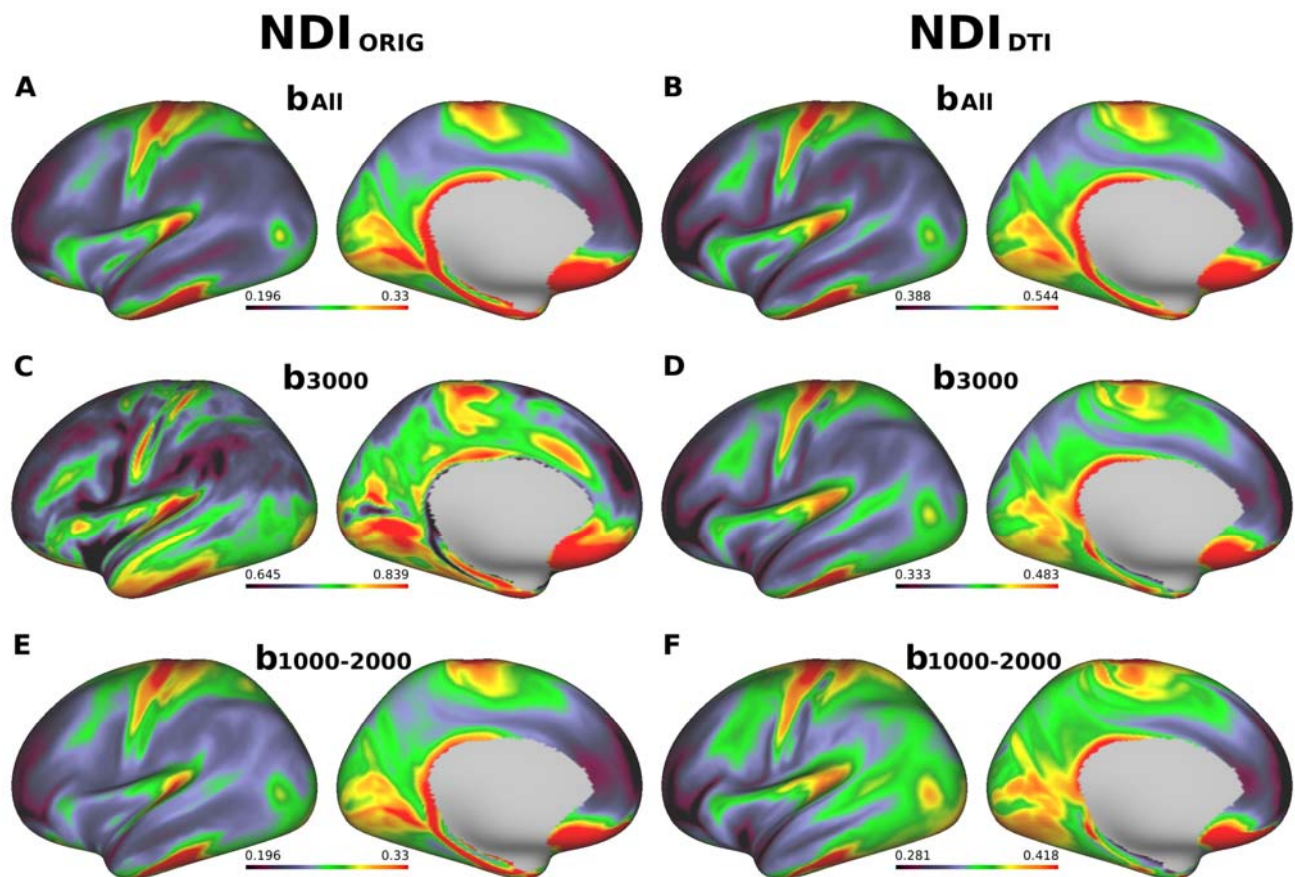

1  
2 **Figure 2.** Cross-subject average cortical surface maps of neurite density index (NDI).  
3 Cortical surfaces are different in terms of computation methods: original NODDI ( $NDI_{ORIG}$ ) vs  
4 DTI-NODDI ( $NDI_{DTI}$ ) and b-shell datasets used: all three b-values ( $b_{All}$ ), only those of  $b=3000$   
5 ( $b_{3000}$ ) and two-shell with low b-values ( $b_{1000-2000}$ ). **A)** Cortical surface maps of NDI calculated using  
6 the original NODDI model ( $NDI_{ORIG}$ ) with the three-shell dataset ( $b_{All}$ ), which shows high intensity  
7 in primary sensorimotor, visual, auditory cortices as well as the middle temporal (MT) area, as  
8 reported previously (Fukutomi et al., 2018). **B)**  $NDI_{DTI}$  calculated using the three-shell dataset ( $b_{All}$ ),  
9 which shows very similar distributions of contrasts as in A. **C)**  $NDI_{ORIG}$  using the one-shell dataset  
10 ( $b_{3000}$ ), which shows a different pattern from the reference cortical map in A, while  $NDI_{DTI}$  using the  
11 one-shell high b-value dataset ( $b_{3000}$ ) in D shows very similar surface contrasts to the reference in  
12 A. **E, F)** The cortical neurite maps of two-shell dataset with low b-values ( $b_{1000-2000}$ ) were also similar  
13 to the reference, but not much as those of  $b_{All}$  and  $b_{3000}$ . Data at <https://balsa.wustl.edu/xqln>  
14



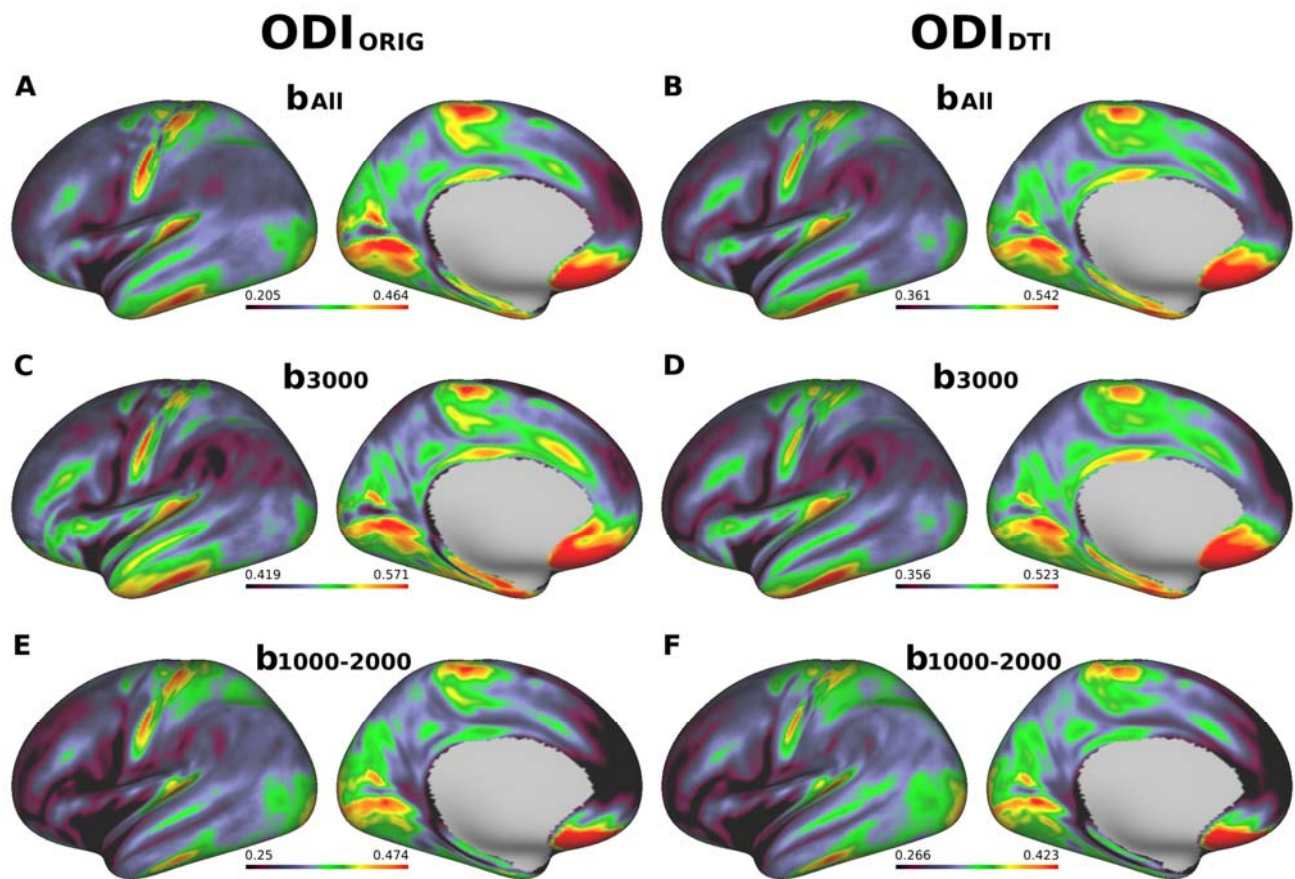

1  
 2 **Figure 3.** Cross-subject average cortical surface maps of orientation dispersion index (ODI).  
 3 Cortical surfaces are different in terms of computation methods: original NODDI ( $ODI_{ORIG}$ ) vs  
 4 DTI-NODDI ( $ODI_{DTI}$ ) and the b-shell datasets used: all three b-values ( $b_{All}$ ) vs only those of  $b=3000$   
 5 ( $b_{3000}$ ) and two low b-values ( $b_{1000-2000}$ ). **A**, **C** and **E** show cortical surface maps of ODI calculated  
 6 using the original NODDI model ( $ODI_{ORIG}$ ) with the three-shell dataset ( $b_{All}$ ), one-shell dataset  
 7 ( $b_{3000}$ ) and two-shell dataset ( $b_{1000-2000}$ ), respectively. **B**, **D** and **F** show surface maps of ODI  
 8 calculated using DTI-NODDI ( $ODI_{DTI}$ ) with the three-shell dataset ( $b_{All}$ ), one-shell high b-value  
 9 dataset ( $b_{3000}$ ) and two-shell dataset ( $b_{1000-2000}$ ), respectively. Data at <https://balsa.wustl.edu/P7LX>  
 10

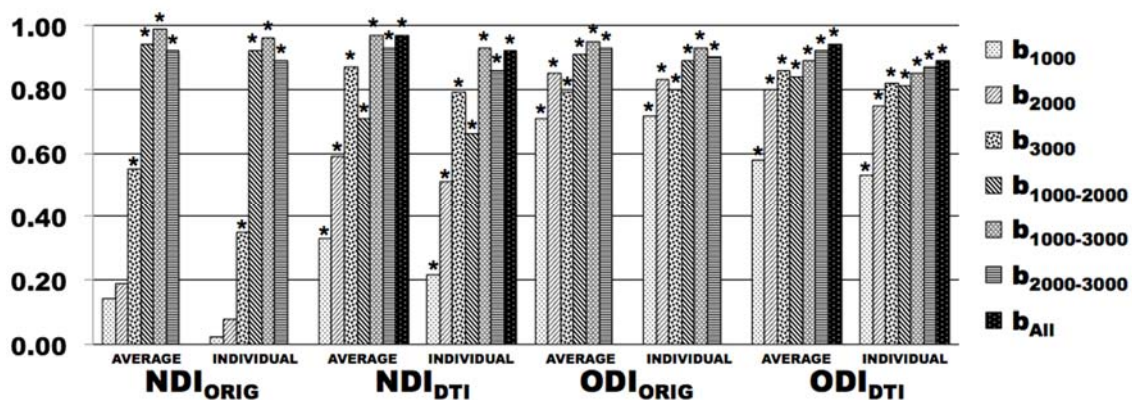

11  
 12 **Figure 4.** Correlation coefficients of NODDI parameters in different calculation methods with those  
 13 in the reference ( $NDI_{ORIG}$  and  $ODI_{ORIG}$  with  $b_{All}$ ). Correlation coefficients were calculated  
 14 using each b-shell dataset types ( $b_{1000}$ ,  $b_{2000}$ ,  $b_{3000}$ ,  $b_{1000-2000}$ ,  $b_{1000-3000}$ ,  $b_{2000-3000}$  and  $b_{All}$ ). Correlation

1 coefficients, which were calculated using average surface maps among all subjects, are shown in  
2 “AVERAGE”, while average of correlation coefficients, which were calculated in individual subjects,  
3 are shown in “INDIVIDUAL”. Asterisks (\*) denotes statistical significance level with  $p < 0.00001$ .  
4 Data at <https://balsa.wustl.edu/7MZG>

5

6 To investigate further this difference of the values between DTI-NODDI and original NODDI  
7 parameters, the Bland-Altman analysis was applied to the values of cortical parcellations using those  
8 of complete data and original NODDI as a reference. When all of the dMRI data ( $b_{All}$ ) were used, the  
9 results of DTI-NODDI showed a consistent bias:  $NDI_{DTI}$  overestimated by a difference of around  
10 0.20 and  $ODI_{DTI}$  by 0.15 to 0.10 as compared with those of original NODDI (Fig. 5 A, C). Therefore,  
11 these findings indicate that despite a steady bias, the DTI-NODDI model allows evaluating variance  
12 in cortical neurite properties similar to that in the original NODDI, at least when the full dataset of  
13 HCP dMRI was used.

14



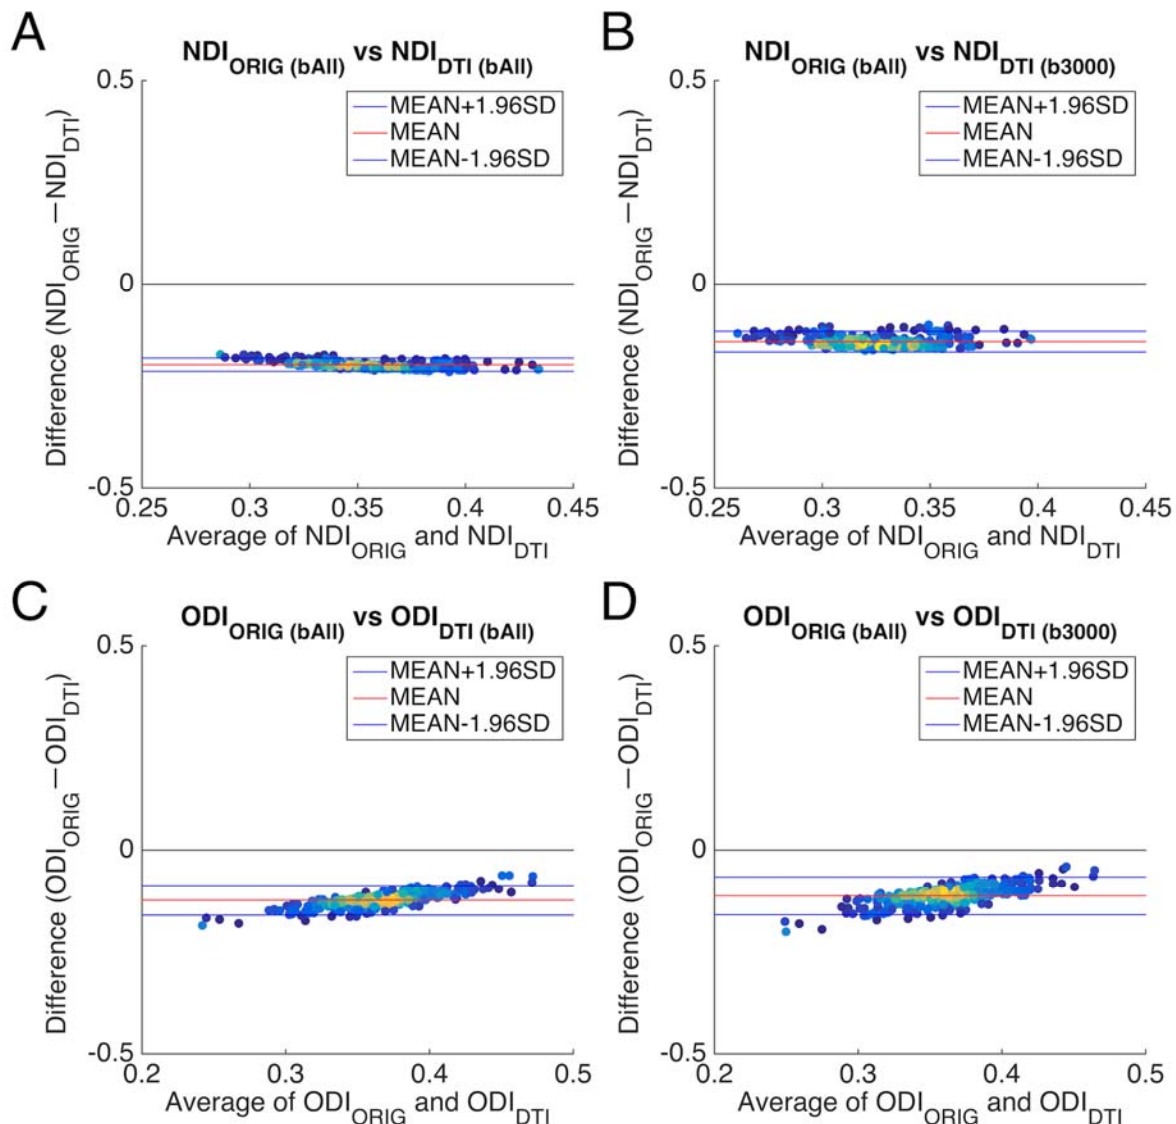

1

2 **Figure 5.** Bland-Altman plots between DTI-NODDI and original NODDI in vivo. **A** and **C** show  
 3 Bland-Altman plots between DTI-NODDI parameters in the three-shell dataset (bAll) and the  
 4 original NODDI parameters in the three-shell dataset (bAll). **B** and **D** show Bland-Altman plots  
 5 between DTI-NODDI parameters in the high b-value one-shell dataset (b3000) and the original  
 6 NODDI parameters in the three-shell dataset (bAll). Plots are coloured by their density. Blue lines  
 7 show the mean $\pm$ 1.96\*SD and the red line shows the mean value. Abbreviations; NDI<sub>ORIG</sub>: neurite  
 8 density index estimated using the original NODDI model, ODI<sub>ORIG</sub>: orientation dispersion index  
 9 estimated using the original NODDI model, NDI<sub>DTI</sub>: neurite density index estimated using  
 10 DTI-NODDI, ODI<sub>DTI</sub>: orientation dispersion index estimated using DTI-NODDI. Data at  
 11 <https://balsa.wustl.edu/6gwK>

12

13 We further tested whether DTI-NODDI can provide valid results given fewer b-shell datasets of  
 14 dMRI. Interestingly, using a one-shell high b-value dataset (b3000), the cortical maps of DTI-NODDI  
 15 resulted in similar and comparable surface distributions to the reference for both NDI<sub>DTI</sub> (Fig. 2D)

1 and  $ODI_{DTI}$  (Fig. 3D) in average surface maps, while using this one-shell dataset in the original  
2 NODDI failed to show such a cortical pattern in NDI (Fig. 2C). The pattern was again evident in a  
3 single subject (Fig. S2 D and Fig. S3 D). The correlation coefficients were very high in the  
4 group-wise maps for  $NDI_{DTI}$  and  $ODI_{DTI}$  ( $R=0.87$ ,  $R=0.86$ , respectively,  $p<0.00001$ ), as well as in  
5 individuals ( $R=0.79$ ,  $R=0.82$ , respectively,  $p<0.00001$ ) (Fig. 4). The regression equations were as  
6 follows; NDI:  $Y = 0.82X - 0.071$ , ODI:  $Y = 1.4X - 0.27$ . The Bland-Altman analysis showed that the  
7 high b-value one-shell dataset ( $b_{3000}$ ) had a constant bias of  $NDI_{DTI}$  that was a little smaller than that  
8 in three-shell dataset ( $b_{All}$ ) (Fig. 5 A, B). The bias of  $ODI_{DTI}$  was almost same as in the three-shell  
9 dataset (Fig. 5 C, D).

10  
11 As for the other datasets, a two-shell dataset including a high b-value shell ( $b_{1000-3000}$  and  $b_{2000-3000}$ )  
12 also provided reasonable and comparable results with the original NODDI surface maps ( $NDI_{ORIG}$   
13 and  $ODI_{ORIG}$ ) (Fig. S4 and S5). If  $b=3000$  is included ( $b_{1000-3000}$  and  $b_{2000-3000}$ ), both  $NDI_{DTI}$  and  
14  $ODI_{DTI}$  showed a similar surface distribution to the reference (Fig.S4 A, D, F, Fig.S5 A, D, F). The  
15 correlation coefficients were very high in the group-wise maps for both  $NDI_{DTI}$  and  $ODI_{DTI}$   
16 ( $b_{1000-3000}$ :  $R=0.97$ ,  $R=0.89$ ,  $b_{2000-3000}$ :  $R=0.93$ ,  $R=0.92$ , respectively,  $p<0.00001$ ), as well as in  
17 individuals ( $b_{1000-3000}$ :  $R=0.93$ ,  $R=0.85$ ,  $b_{2000-3000}$ :  $R=0.86$ ,  $R=0.87$ , respectively,  $p<0.00001$ ) (Fig. 4). If a  
18 high b-value shell was not included ( $b_{1000-2000}$ ), which is commonly achievable on clinical 3T  
19 scanners,  $NDI_{DTI}$  was a little different but still had a similar surface distribution to the reference (Fig.  
20 2 A, F), and the correlation coefficient was reasonably high in the group-wise maps ( $R=0.71$ ,  
21  $p<0.00001$ ), as well as in individuals ( $R=0.66$ ,  $p<0.00001$ ) (Fig. 4), while  $ODI_{DTI}$  showed high  
22 correlations in the group-wise maps ( $R=0.84$ ,  $p<0.00001$ ), as well as in individuals ( $R=0.81$ ,  
23  $p<0.00001$ ) (Fig. 3 A, F, Fig. 4). The Bland-Altman analysis showed that the dataset of high and low  
24 b-value two-shell ( $b_{1000-3000}$ ) (Fig. S6) had a constant bias of  $NDI_{DTI}$  and slightly upward sloping bias  
25 of  $ODI_{DTI}$ , which were almost the same size as in the three-shell dataset. High b-value two-shell  
26 ( $b_{2000-3000}$ ) (Fig.S6 A) had also a constant bias of  $NDI_{DTI}$  but with a somewhat smaller size than that  
27 in three-shell dataset ( $b_{All}$ ). The bias of  $ODI_{DTI}$  was almost same size as in the three-shell dataset (Fig.  
28 5 C, S6 B).

29  
30 One-shell datasets using lower b-value shells (i.e.  $b_{1000}$  and  $b_{2000}$ ) did not provide reasonable surface  
31 maps of  $NDI_{DTI}$  (Fig. S4 L, N) and  $ODI_{DTI}$  (Fig. S5 L, N). For example, for the low b-value one-shell  
32 dataset ( $b_{1000}$ ), both  $NDI_{DTI}$  and  $ODI_{DTI}$  showed different surface distributions from the reference  
33 (Fig. S4 A, N, Fig. S5 A, N), as well as very low correlation coefficients for  $NDI_{DTI}$  ( $R=0.33$   
34  $p<0.00001$  in group and  $R=0.22$ ,  $p<0.00001$  in individuals) and  $ODI_{DTI}$  ( $R=0.58$ ,  $p<0.00001$  in group,

1 R=0.53  $p < 0.00001$  in individuals) (Fig. 4). This trend was also found when using the middle high  
2 b-value one-shell dataset ( $b_{2000}$ ). Only  $ODI_{DTI}$  showed a similar surface distribution to the reference  
3 (Fig. S5 A, L) and high correlation coefficients ( $R=0.80$ ,  $p < 0.00001$  in the group average,  $R=0.75$ ,  
4  $p < 0.00001$  in individual) (Fig. 4), while  $NDI_{DTI}$  showed different surface distribution from the  
5 reference (Fig. S4 A, L) and relatively low correlations ( $R=0.59$ ,  $p < 0.00001$  in the group average,  
6  $R=0.51$ ,  $p < 0.00001$  in individuals) (Fig. 4).

7  
8 The biases of DTI-NODDI in the other b-shell datasets were shown in Fig. S6. It is of note that  
9 although both the three b-shell dataset ( $b_{All}$ ) and one-shell high b-value ( $b_{3000}$ ) had fixed biases of  
10 DTI-NODDI, a dataset with low b-value dataset ( $b_{1000}$ ) did not show as large of a bias in the NDI  
11 (Fig. S6 A).

12  
13 It is also of note that the cortical bias dependency on the b-shell scheme was also found in the  
14 original NODDI. As described previously, the high b-value one-shell dataset ( $b_{3000}$ ) did not show a  
15 comparable cortical distribution of NDI to the reference (Fig. 2C). Other one-shell datasets ( $b_{1000}$ ,  
16  $b_{2000}$ ) in the original NODDI also did not show comparable cortical distribution, particularly in NDI  
17 (Fig. S4 A, I, K, M) or high correlations (Fig. 4) with the reference.

18  
19 As for reproducibility,  $NDI_{DTI}$  and  $ODI_{DTI}$  showed the highest reproducibility when using the  
20 three-shell dMRI data ( $b_{All}$ ) ( $NDI_{DTI}$ : ICC=0.60, CR=0.0081,  $ODI_{DTI}$ : ICC=0.64, CR=0.011) among  
21 all of datasets (Table S1), followed by datasets with high b-value two-shell ( $b_{1000-3000}$ ,  $b_{2000-3000}$ ) and  
22 one-shell ( $b_{3000}$ ) (ICC>0.55, CR<0.011) (Table S1). These results did not differ much from those of  
23 the original NODDI; e.g. when using three-shell dMRI data ( $b_{All}$ ),  $NDI_{ORIG}$ : ICC=0.58, CR=0.0073,  
24  $ODI_{ORIG}$ : ICC=0.64, CR=0.016 (Table S1).

### 25 26 3.1.2 Calculation time of DTI-NODDI

27 The calculation time of the DTI model were less than three minutes per subject using the three-shell  
28 dMRI dataset as an input, and that of DTI-NODDI was less than one minute per subject using the  
29 DTI model data as the input. Therefore, the total calculation time from dMRI data to the DTI-based  
30 NODDI estimates was less than 4 minutes. In contrast, the calculation time of the original NODDI  
31 model with AMICO was more than one hour per subject using same computer.

## 32 33 3.2 Results of simulations on the error sources of DTI-NODDI

### 34 3.2.1 Validity of cortical DTI-NODDI to assume negligible CSF

1 We investigated whether value of  $V_{iso}$  ( $=0.1$ ) in the cortex is small enough to use the mathematical  
2 relationship between DTI and NODDI, which assumes negligible CSF for each b-shell dataset using  
3 simulation analysis (see 2.3.1 for details). When noise free data were used,  $NDI_{DTI}$  and  $ODI_{DTI}$   
4 showed extremely strong linear correlation with the ground truth not only in high b-value datasets  
5 but also in low b-value datasets (all of them,  $R>0.97$ ,  $p<0.00001$ ) (Fig. 6). When Gaussian noise was  
6 added,  $NDI_{DTI}$  also showed a very strong linear correlation with the ground truth as high as for noise  
7 free data in all b-shell datasets.  $ODI_{DTI}$  also showed very a strong linear correlation, but somewhat  
8 lower than noise free data in all b-shell datasets (Fig. 6).

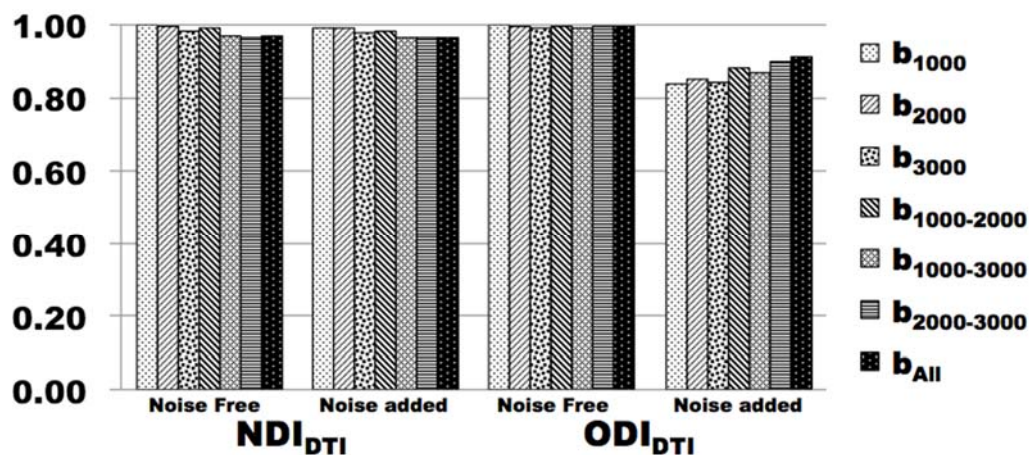

10  
11 **Figure 6.** Correlation coefficients of DTI-NODDI parameters ( $NDI_{DTI}$  and  $ODI_{DTI}$ ) with respect to  
12 the ground truth in simulation analysis. Correlation coefficients were calculated using various b-shell  
13 dataset types ( $b_{1000}$ ,  $b_{2000}$ ,  $b_{3000}$ ,  $b_{1000-2000}$ ,  $b_{1000-3000}$ ,  $b_{2000-3000}$  and  $b_{All}$ ) without noise (Noise Free) and  
14 with Gaussian noise such that  $SNR=20$  (Noise Added). All of them have statistical significance level  
15 with  $p<0.00001$ . Note that this simulation does not consider partial volume effects (see also Figure 7  
16 for simulation of heterogeneity and partial volume effects of CSF). Abbreviations;  $NDI_{ORIG}$ : neurite  
17 density index estimated using the original NODDI model,  $ODI_{ORIG}$ : orientation dispersion index  
18 estimated using the original NODDI model,  $NDI_{DTI}$ : neurite density index estimated using  
19 DTI-NODDI,  $ODI_{DTI}$ : orientation dispersion index estimated using DTI-NODDI. Data at  
20 <https://balsa.wustl.edu/17Mg>

21  
22 Despite the high correlation, it is of note that the Bland-Altman analysis showed a constant bias  
23 between DTI-NODDI and original NODDI. Both  $NDI_{DTI}$  and  $ODI_{DTI}$  had a positive constant bias  
24 when used with the all b-shell dataset without random noise (Fig. 7 A). The degree of bias was not  
25 substantially changed when using high b-value datasets ( $b_{3000}$ ,  $b_{1000-3000}$  and  $b_{2000-3000}$ ), but they were  
26 smallest or absent when using a dataset of one-shell low b-value ( $b=1000$ ) (Fig.S7-8). This pattern of  
27 bias in  $NDI_{DTI}$  and  $ODI_{DTI}$  (i.e. constant bias is sensitive to high b-value dMRI data) was basically  
28 same when tissue  $V_{iso}$  was assumed to be 0 (Fig. S9-10). In addition, the overall patterns of the bias  
29 replicated those in HCP data.

1

2 When the Bland-Altman analysis was performed using the noise added data, the pattern of constant  
3 bias in  $NDI_{DTI}$  was observed similarly to noise free data (Fig. 7 B), and the slightly upward sloping  
4 bias in  $ODI_{DTI}$  was observed similarly to in vivo data (Fig. 7 B). These findings in the simulation  
5 study suggest that 1) the assumption of negligible  $V_{iso}$  in the cortical DTI-NODDI is acceptable at  
6 least in terms of the linearity of the values for all types of b-shell datasets. Random noise also  
7 slightly degraded estimation of  $ODI_{DTI}$ , but still the correlation was very high ( $R > 0.8$ ). 2) Since these  
8 simulations all assumed that CSF volume of the cortex is ‘homogeneously’ very low, the next  
9 analysis will focus on this issue of inhomogeneity of CSF. 3) There are constant biases of NDI and  
10 ODI of DTI-NODDI when high b-value datasets are used. We speculate that these may be due to the  
11 error propagation from DTI measures, which are known to be biased when used high b-values  
12 dataset (see Discussion 4.3). Actually, our simulation showed that biases of DTI parameters were  
13 dependent on the b-values and random noise of data used in the analysis, i.e. when using data with  
14 higher b-values, the values of MD were underestimated (Fig. S11) and those of FA were  
15 overestimated (Fig. S12). The lower the SNR, the more values of FA were underestimated (Fig. S12),  
16 while those of MD were not biased (Fig. S11).

17



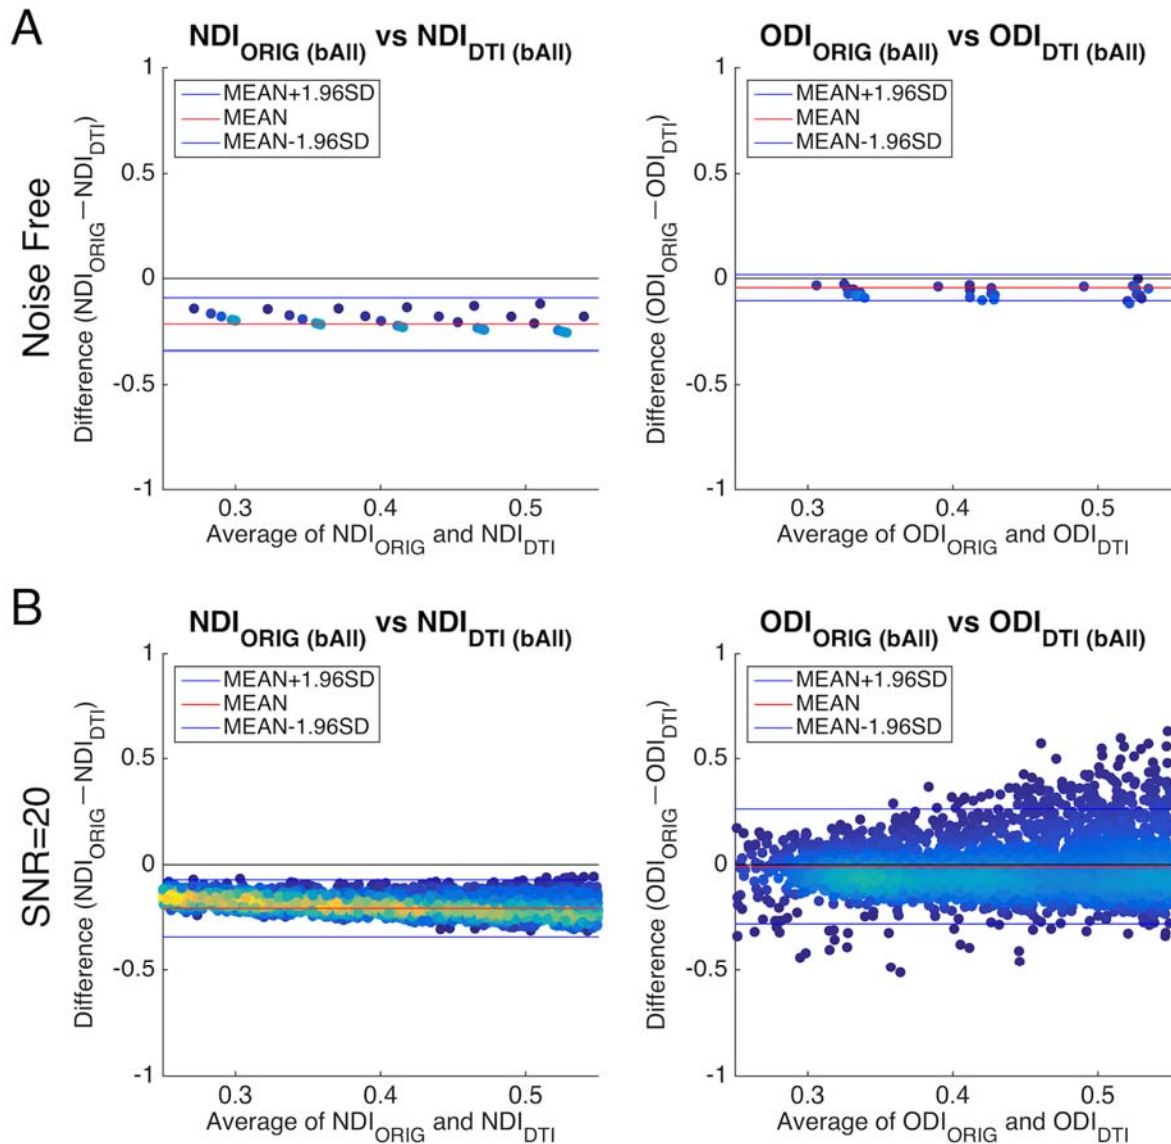

1  
 2 **Figure 7.** Bland-Altman plots between DTI-NODDI parameters and original NODDI parameters  
 3 using the three-shell dataset (bAll) in simulation analysis. A shows Bland-Altman plots with noise  
 4 free data. B shows Bland-Altman plots with noise added data such that SNR=20. Plots are coloured  
 5 by their density. Abbreviations; NDI<sub>ORIG</sub>: neurite density index estimated using the original  
 6 NODDI model, ODI<sub>ORIG</sub>: orientation dispersion index estimated using the original NODDI model,  
 7 NDI<sub>DTI</sub>: neurite density index estimated using DTI-NODDI, ODI<sub>DTI</sub>: orientation dispersion index  
 8 estimated using DTI-NODDI. Data at <https://balsa.wustl.edu/5njG>

9

### 10 3.2.2 Error sensitivity of cortical DTI-NODDI to heterogeneity and partial volume effects of CSF

11 The error sensitivity of DTI-NODDI to heterogeneity of  $V_{iso}$  was simulated by analyzing how the  
 12 errors in DTI-NODDI propagated from the error in  $V_{iso}$  (see 2.3.2 for details). By evaluating  
 13 different b-shell schemes, we found apparent differences in the error sensitivity of DTI-NODDI  
 14 across different b-shell schemes (Fig. 8). The %error of the DTI-NODDI estimates tended to be

1 smaller in datasets that included high b-value volumes ( $b=3000$ ) ( $b_{3000}$ ,  $b_{1000-3000}$ ,  $b_{2000-3000}$  and  $b_{All}$ )  
 2 than in those not including  $b=3000$  images ( $b_{1000}$ ,  $b_{2000}$ , and  $b_{1000-2000}$ ) when noise level was  $SNR=20$   
 3 (Fig. 8A); i.e. b-shell datasets including  $b=3000$  images were more robust against heterogeneity of  
 4  $V_{iso}$  than low b-value datasets. The largest %error in  $NDI_{DTI}$  and  $ODI_{DTI}$  were found in low b-value  
 5 one-shell dMRI data ( $b_{1000}$ ) and the smallest %error were found in the three-shell dMRI data ( $b_{All}$ ),  
 6 with similar %error in high b-value two-shell dMRI data ( $b_{1000-3000}$ ). Random noise levels also  
 7 affected the degree of %errors but did not change the ranking of b-shell datasets (Fig. 8B). These  
 8 differences in the error sensitivity of  $V_{iso}$  should be a major contributor of the difference in linearity  
 9 among different b-shell datasets.

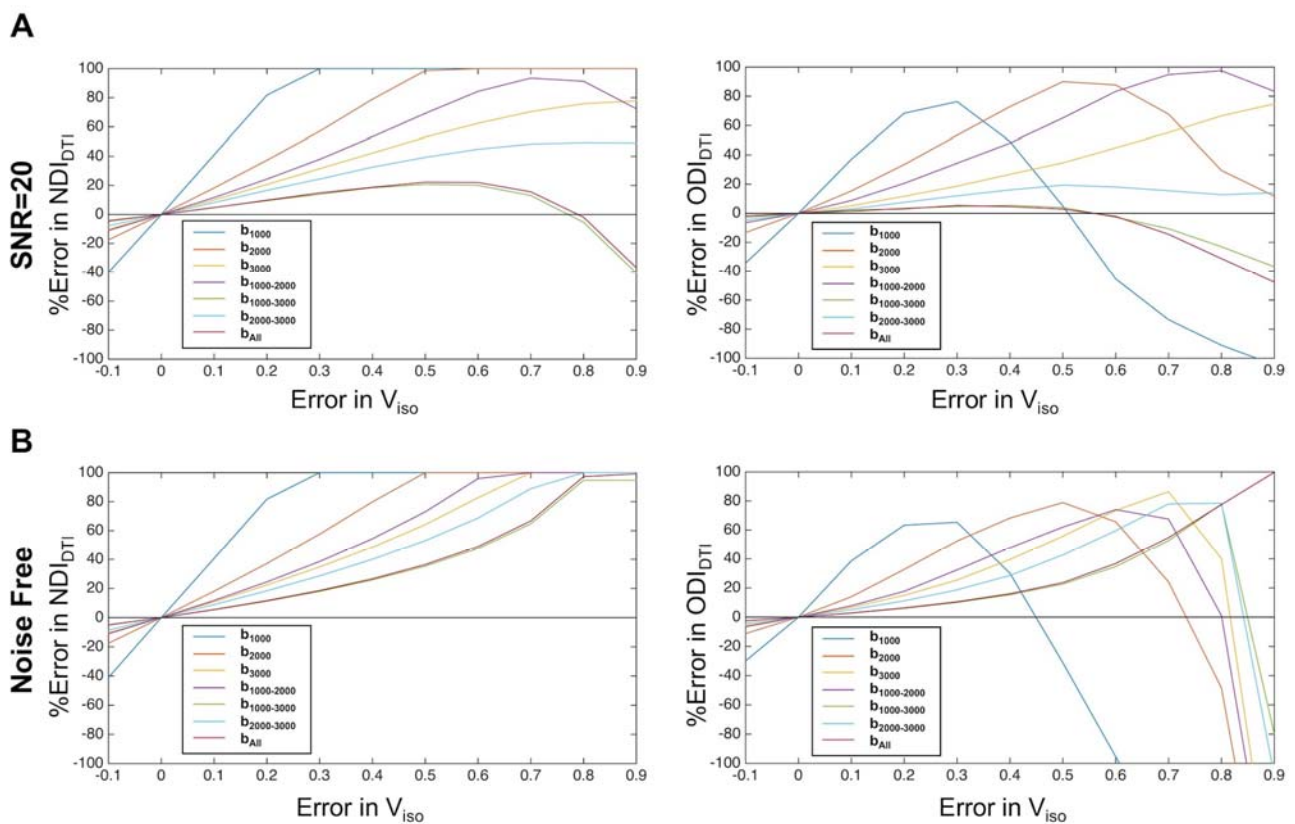

10  
 11 **Figure 8.** Error propagation of the DTI-NODDI from error in the CSF volume fraction ( $V_{iso}$ ).  
 12 The %error in the estimate of DTI-NODDI was simulated under variable errors in  $V_{iso}$  relative to a  
 13 true value ( $V_{iso}=0.1$ ). **A)** Results when using noise-added datasets with a noise level of  $SNR=20$ , **B)**  
 14 Results when using noise-free datasets. Dataset types of b-shell schemes  $b_{1000}$ ,  $b_{2000}$ ,  $b_{3000}$ ,  $b_{1000-2000}$ ,  
 15  $b_{1000-3000}$ ,  $b_{2000-3000}$  and  $b_{All}$  are shown in different colored lines as in the legend in each graph. Note  
 16 that the one-shell low b-value data set ( $b_{1000}$ ) is the largest error among all the datasets and  
 17 particularly sensitive to small error in  $V_{iso}$ , which may include partial volume effects in the cortical  
 18 gray matter. The smallest error was found when using the three-shell dMRI data ( $b_{All}$ ) or the high  
 19 b-value two-shell dMRI data ( $b_{1000-3000}$ ). Abbreviations;  $NDI_{DTI}$ : neurite density index estimated  
 20 using DTI-NODDI,  $ODI_{DTI}$ : orientation dispersion index estimated using DTI-NODDI, SNR: signal  
 21 noise ratio. Data at <https://balsa.wustl.edu/nPxP>

22

23



## 1 Discussion

2 We found that cortical DTI-NODDI showed a high correlation with known cortical distributions of  
3 neurite properties of the original NODDI, particularly when using high b-value dMRI data. The  
4 similarity was also evident even when one-shell high b-value dMRI data was used for DTI-NODDI.  
5 The amount of CSF estimated in the cerebral cortex using the original NODDI was small but  
6 non-zero. The simulation study revealed less sensitivity of errors in DTI-NODDI to partial voluming  
7 and heterogeneity of CSF particularly when using high b-value dMRI data. However, the HCP data  
8 and simulation showed that high b-value dMRI data resulted in a constant numerical bias, i.e. same  
9 amount of error over the range of values.

10

11 The mathematical solution of DTI-NODDI indicated one-to-one correspondence between DTI-MD  
12 and NODDI-NDI over an expected range of values (Fig. 1). The NODDI NDI is an inverse function  
13 of DTI MD as shown in Eq. (2) and Fig. 1A, while the NODDI ODI is a function of both DTI FA  
14 and MD as in Eq. (3)-(5) and Fig. 1B. The former relationship was in fact confirmed by in vivo data  
15 in human brain (Fukutomi et al., 2018), which showed high correlation between cortical DTI MD  
16 and NODDI NDI ( $R=0.97$ ) as in Fig. 4 B (Fukutomi et al., 2018). However, this observation was  
17 based on the measures calculated using the all b-value dataset of HCP ( $b=1000, 2000, 3000$ ), and the  
18 relationship between ODI and DTI measures was not explored. Therefore, the present study  
19 extensively studied the validity of the DTI-NODDI using different dMRI b-value schemes in the  
20 same HCP subjects.

21

22 Our simulations indicated that in any b-shell scheme the DTI-NODDI has a reasonably close  
23 relationship to the original NODDI even when noise is added (Fig. 6), while the in vivo measures of  
24 cortical DTI-NODDI agreed only when using datasets that included the high b-value shell ( $b=3000$ )  
25 (Fig. 4). When not using the high b-value shell, the cortical distribution of NDI and ODI of  
26 DTI-NODDI showed completely different pattern from those of original NODDI (Fig. S4-5). Why  
27 was the predictability of DTI-NODDI degraded when not using high b-value data, and why did the  
28 low b-value DTI-NODDI show poor correlation in spatial pattern? Our simulation suggests this is  
29 because low b-value DTI-NODDI is more sensitive to errors due to heterogeneity and partial  
30 voluming of CSF (Fig. 8). Low b-value dMRI is theoretically sensitive to fluid signals or ‘T2  
31 shine-through’ effect as well as to tissue diffusivity, whereas high b-value dMRI is more specific to  
32 tissue diffusivity (Burdette et al., 2001; DeLano et al., 2000). In addition, the partial volume effects  
33 of CSF may vary across cortical regions according to cortical thickness and their heterogeneity  
34 within the cortex is an important and unavoidable issue when using currently available MRI

1 (Gonzalezballester, 2002). The DTI model also suffers from a partial volume effect of CSF and  
2 results in fitting error particularly in the cortex (Basser et al., 1994b; Papadakis et al., 1999), as it  
3 does not consider a CSF compartment explicitly like in NODDI. Although the partial volume effect  
4 is reduced by surface-based analysis reduces compared to volume-based analysis (see Supplementary  
5 text, Fig. S1), it is not completely removed.

6  
7 Despite the high correlation of cortical metrics with original NODDI, the numerical values of  
8 DTI-NODDI when using high b-value data were not the same as those in the original NODDI.  
9 Bland-Altman plots of DTI-NODDI in HCP data showed a positive fixed bias in both NDI and ODI,  
10 particularly when using datasets with high b-value ( $b=3000$ ), and the bias was the least when used a  
11 single-shell dataset of low b-value ( $b=1000$ ) (Fig. 5, S6-7). This pattern was also confirmed in the  
12 simulation study, in which positive bias was the largest in DTI-NODDI using the high b-value  
13 datasets and the least when using the low b-value dataset, regardless of tissue CSF or random noise  
14 (Fig. 7, Fig.S7-8 and Fig. S9-10). The biases of DTI-NODDI are likely caused by the biases already  
15 in DTI, since measures of the former are mathematically calculated from those of the latter (Fig. 1).  
16 In fact, our full simulation showed that biases of DTI parameters were dependent on the b-values of  
17 data and random noise of data used in the analysis, i.e. when using data with higher b-values, the  
18 values of MD were underestimated (Fig. S11) and those of FA were overestimated (Fig. S12). The  
19 lower the SNR, the more values of FA were underestimated (Fig. S12), whereas those of MD were  
20 not biased (Fig. S11). These results were also consistent with previous studies, e.g. MD is biased to  
21 lower value by using dMRI data with higher b-value than with standard b-value ( $b=1000$ ) (Hui et al.,  
22 2010), and FA is positively biased with lower SNR, while MD is robust to lower SNR (Farrell et al.,  
23 2007; Jones and Basser, 2004; Pierpaoli and Basser, 1996). Therefore, according to Eq (3)-(5), using  
24 low SNR data may enhance the positive bias in FA and hence cause an upward bias in  $ODI_{DTI}$ .  
25 Therefore, the fixed biases of DTI-NODDI comes from the DTI model and non-linearity of the  
26 actual data, rather than the partial volume effect of CSF. Edwards et al. also refer to the kurtosis of  
27 diffusion signals in high b-value data, which can cause the bias in the DTI-NODDI (Edwards et al.,  
28 2017).

29  
30 The current study shows a potential use of DTI-NODDI in estimating cortical neurites, however,  
31 there are many caveats when practically using this. One advantage of cortical DTI-NODDI may be  
32 that it could allow shorter dMRI scans, which could be helpful for clinical studies such as  
33 Alzheimer's disease. DTI can be estimated with relatively few directions - at least 6 or in general  
34 more than 30 are recommended (Jones, 2004), whereas the original NODDI is recommended with at

1 least 90 directions (Zhang et al., 2012). Even scanning with high spatial resolution dMRI as in the  
2 HCP, the duration of a dMRI scan with 30 directions should not exceed 3 min. On the other hand,  
3 there are several disadvantages of using DTI-NODDI. First, when scanning with high b-values, it is  
4 uncertain whether the bias due to kurtosis will be near-constant even in pathological brains. Thus,  
5 this needs to be addressed in clinical studies to evaluate homogeneous sensitivity to cortical  
6 pathologies. There is also a possible improvement in the accuracy of cortical DTI-NODDI by  
7 applying a special sequence, such as ‘fluid-attenuated inversed recovery DTI’, reducing CSF signal  
8 in tissue even in low b-value dMRI (Chou et al., 2005; Kwong et al., 1991), potentially allowing low  
9 b-value DTI-NODDI without partial voluming of CSF. Second, the limited number of directions of  
10 dMRI may hamper sophisticated analysis such as diffusion tractography that usually requires high  
11 number of directions. Therefore, short time dMRI data optimized for DTI-NODDI could not be used  
12 for such a sophisticated analysis.

13

14 Additional issues remain to be discussed. First, there is debate over the optimality of NODDI. Two  
15 issues will be discussed here as they relate to the current study. 1) In the current study, we considered  
16 the original NODDI parameters calculated using the three-shell dMRI datasets to be a ‘gold  
17 standard’, however, the optimal b-shell scheme for NODDI for true neurite estimation is still an open  
18 question. The original study that proposed NODDI suggested that the values of NODDI parameters  
19 did not strongly differ as long as two b-shell datasets were used (Zhang et al., 2012). This was  
20 consistent with the present study, which showed that in any combinations of two-shell datasets, the  
21 original NODDI measures were strongly correlated with those of the ‘gold standard’ three-shell  
22 dataset (Fig. 4). The optimal b-shell scheme of NODDI is, however, difficult to determine and out of  
23 scope of the current study, as in general the accuracy of non-linear fitting of the model largely relies  
24 on the number of discrete datasets, which is practically limited to a small number of b-shells in  
25 clinical dMRI. Therefore, we used the full three-shell dataset in HCP as a gold-standard of NODDI  
26 parameters. 2) The second issue is related to the assumptions of intrinsic diffusivity in the original  
27 NODDI model, which is also applicable to DTI-NODDI. Recent studies showed that the intrinsic  
28 diffusivity in the tortuosity model used in NODDI may not be realistic, and different between in the  
29 intra- and extra-neurite compartments (Jelescu et al., 2016), and the value of intrinsic diffusivity is  
30 variable across brain regions (Kaden et al., 2016). However, they needed to ignore the CSF  
31 compartment to estimate variability of the intrinsic diffusivity. There is also a recent attempt to apply  
32 a diffusion model using a general framework without fixing diffusivity (Lampinen et al., 2017),  
33 though stability, robustness, histological validity need to be evaluated.

34

1 Second, the current technique of DTI-NODDI needs to be carefully extended for application. As  
2 discussed above, the current analysis is all based on the data of young healthy subjects in HCP, and it  
3 is premature to conclude that DTI-NODDI can also provide similar results to NODDI in clinical  
4 patients. Thus further investigations are needed in the future. The technique also needs to be tested  
5 for investigating the neurite properties in the white matter. In fact, Edwards et al. applied  
6 DTI-NODDI in the white matter using one-shell low b-value dMRI data (Edwards et al., 2017) and  
7 they applied a correction of the bias due to kurtosis.

8

## 9 **5. Conclusion**

10 Cortical DTI-NODDI showed similar distributions to that of the original NODDI model, particularly  
11 when using at least one-shell of high b-value dMRI data. The DTI-NODDI with low b-value dMRI  
12 should have a smaller bias in absolute quantity in simulation but is practically biased in in vivo  
13 cortical distribution due to heterogeneity and partial voluming of CSF. These findings suggest that  
14 DTI can predict microstructural features related to neurites in the cerebral cortex at least when the  
15 conditions of data acquisition meet certain requirements such as a high b-value shell and high spatial  
16 resolution of dMRI.

17

## 18 **6. Notes**

19 Data of Supplementary Figures are available at <https://balsa.wustl.edu/7M1q>

20

## 21 **7. Acknowledgements**

22 All authors declare no conflict of interest. The data of this study were provided by the Human  
23 Connectome Project, WU-Minn Consortium (Principal Investigators: David Van Essen and Kamil  
24 Ugurbil; 1U54MH091657) funded by the 16 NIH Institutes and Centers that support the NIH  
25 Blueprint for Neuroscience Research; and by the McDonnell Center for Systems Neuroscience at  
26 Washington University. This research is partially supported by the program for Brain Mapping by  
27 Integrated Neurotechnologies for Disease Studies (Brain/MINDS) and Brain/MINDS-beyond from  
28 Japan Agency for Medical Research and development, AMED (JP18dm0207001, JP18dm0307006),  
29 by RIKEN Compass to Healthy Life Research Complex Program from Japan Science and  
30 Technology Agency, JST, by MEXT KAKENHI Grant (16H03300, 16H03306) (T.H.).

31

## 1 8. Appendix

2 In this section, we described formulation and derivation of the NODDI model, by which simulation  
3 study was performed. In the NODDI model, the signal ( $A$ ) of the tissue is composed of CSF ( $A_{iso}$ ),  
4 extracellular ( $A_{ec}$ ) and intracellular compartments ( $A_{ic}$ ) (Zhang et al., 2012) as in Eq. 1. The signal is  
5 also dependent on volume fractions of the CSF compartment ( $v_{iso}$ ) and the intracellular  
6 compartments ( $v_{ic}$ ). We describe in detail how each of  $A_{iso}$ ,  $A_{ec}$ , and  $A_{ic}$  can be expressed  
7 mathematically. We also describe how the Watson distribution can be expressed by a mathematical  
8 equation.

9

### 10 1. CSF compartment ( $A_{iso}$ )

11 Since  $A_{iso}$  is dependent on isotropic diffusion, it can be expressed as

$$12 A_{iso} = e^{-bd_{iso}}, \quad (A1)$$

13

14 where  $b$  is b-value of dMRI and  $d_{iso}$  is the diffusion coefficient of the CSF.

15

### 16 2. Extracellular compartment ( $A_{ec}$ )

17 According to Zhang et al. (Zhang et al., 2012),  $A_{ec}$  is expressed as follows:

$$18 A_{ec} = \exp\left(-b\mathbf{q}^T \cdot \int_{\mathbb{S}^2} f(\mathbf{n}|\boldsymbol{\mu}, \kappa) D(\mathbf{n}) d\mathbf{n} \cdot \mathbf{q}\right), \quad (A2)$$

19 where  $\mathbf{q}$  is an unit vector which is the direction of diffusion weighting gradient and  $D(\mathbf{n})$  is a  
20 cylindrical symmetry tensor whose main axis is along the direction of  $\mathbf{n}$ .

21

22 On the other hand, according to Zhang et al. (Zhang et al., 2012), let  $d_{\parallel}$  and  $d_{\perp}$  be the diffusion  
23 coefficients which are parallel and perpendicular to the main axis in the intracellular compartment,  
24 respectively. The diffusion coefficients ( $d'_{\parallel}$  and  $d'_{\perp}$ ) which are parallel and perpendicular to the  
25 main axis in the extracellular compartment, are expressed as follows:

$$26 \begin{cases} d'_{\parallel} = d_{\parallel} - d_{\parallel}v_{ic}(1 - \tau_1) \\ d'_{\perp} = d_{\parallel} - d_{\parallel}v_{ic}\left(\frac{1 + \tau_1}{2}\right), \end{cases} \quad (A3)$$

27 where  $\tau_1$  is expressed as follows (Zhang et al., 2012):

$$28 \tau_1 = -\frac{1}{2\kappa} + \frac{1}{\sqrt{\pi\kappa} \cdot e^{-\kappa} \cdot \operatorname{erfi}(\sqrt{\kappa})}, \quad (A4)$$

29

30 where  $\operatorname{erfi}(x)$  is the incomplete error function and given as below:

$$1 \quad \operatorname{erfi}(x) = \frac{2}{\sqrt{\pi}} \int_0^x e^{t^2} dt. \quad (A5)$$

2

3 Since the principal axis of the extracellular compartment is assumed to be parallel to the z-axis,

4  $\mathbf{D}_{ec}(\hat{\mathbf{z}}, \kappa)$  is expressed as below:

$$5 \quad \mathbf{D}_{ec}(\hat{\mathbf{z}}, \kappa) = \begin{pmatrix} d'_{\perp} & 0 & 0 \\ 0 & d'_{\perp} & 0 \\ 0 & 0 & d'_{\parallel} \end{pmatrix}. \quad (A6)$$

6

7 Therefore,  $A_{ec}$  is rewritten using Eq. (A2), (A6) as below:

$$8 \quad A_{ec} = \exp(-b \mathbf{q}^T \cdot \mathbf{D}_{ec}(\boldsymbol{\mu}, \kappa) \cdot \mathbf{q}). \quad (A7)$$

9 Since  $\mathbf{D}_{ec}(\boldsymbol{\mu}, \kappa)$  is a cylindrically symmetric tensor whose principal axis is in the direction of the  
10 principal axis of the Watson distribution (described in detail Appendix 4), namely  $\boldsymbol{\mu}$ ,  $\mathbf{q}^T \cdot$

11  $\mathbf{D}_{ec}(\boldsymbol{\mu}, \kappa) \mathbf{q}$  is a function of  $\theta = \mathbf{q} \cdot \boldsymbol{\mu}$  which is the relative angle between the principal axes of  
12 MPG and Watson distribution. Hence, without loss of generality, let  $\boldsymbol{\mu} = \hat{\mathbf{z}}$ . Since  $\mathbf{D}_{ec}(\hat{\mathbf{z}}, \kappa)$  is  
13 cylindrically symmetrical to the z-axis in this case,  $A_{ec}$  depends only on  $\theta = \mathbf{q} \cdot \boldsymbol{\mu}$ , which is the  
14 angle between MPG and z-axis, not on the azimuthal angle  $\phi$ . Hence, without loss of generality, let  
15  $\phi = 0$ . Now, let  $\mathbf{R}(-\theta_q)$  be the rotation matrix, which makes the direction of MPG ( $\mathbf{q}$ ) parallel to  
16 z-axis,

17

$$18 \quad \begin{aligned} \mathbf{q}^T \cdot \mathbf{D}_{ec}(\hat{\mathbf{z}}, \kappa) \mathbf{q} &= (\mathbf{R}(-\theta_q) \cdot \mathbf{q})^T \cdot \mathbf{D}_{ec}(\mathbf{R}(-\theta_q) \cdot \hat{\mathbf{z}}, \kappa) \cdot (\mathbf{R}(-\theta_q) \cdot \mathbf{q}) \\ 19 \quad &= \hat{\mathbf{z}}^T \cdot \mathbf{D}_{ec}(\mathbf{R}(-\theta_q) \cdot \hat{\mathbf{z}}, \kappa) \cdot \hat{\mathbf{z}} \\ 20 \quad &= (0 \quad 0 \quad 1) \begin{pmatrix} 1 & 0 & 0 \\ 0 & \cos\theta & -\sin\theta \\ 0 & \sin\theta & \cos\theta \end{pmatrix}^T \begin{pmatrix} d'_{\perp} & 0 & 0 \\ 0 & d'_{\perp} & 0 \\ 0 & 0 & d'_{\parallel} \end{pmatrix} \begin{pmatrix} 1 & 0 & 0 \\ 0 & \cos\theta & -\sin\theta \\ 0 & \sin\theta & \cos\theta \end{pmatrix} \begin{pmatrix} 0 \\ 0 \\ 1 \end{pmatrix} \\ 21 \quad &= d'_{\perp} \sin^2\theta + d'_{\parallel} \cos^2\theta. \quad (A8) \end{aligned}$$

22

23 Summarizing the above,  $A_{ec}$  is denoted using Eq. (A7), (A8) as below:

$$24 \quad A_{ec} = \exp(-b(d'_{\perp} \sin^2\theta + d'_{\parallel} \cos^2\theta)), \quad (A9)$$

25 where  $\theta = \mathbf{q} \cdot \boldsymbol{\mu}$ .

26

### 27 3. Intracellular compartment ( $A_{ic}$ )

28 According to Zhang et al.,

$$1 \quad A_{ic} = \int_{\mathbb{S}^2} f(\mathbf{n}|\boldsymbol{\mu}, \kappa) e^{-bd_{\parallel}(q\mathbf{n})^2} d\mathbf{n}, \quad (\text{A10})$$

2 where  $d_{\parallel}$  is intrinsic diffusivity.  $A_{ic}$  cannot be expressed by elementary functions. First, the Watson  
3 distribution is expanded using spherical harmonics. Let  $f_{l0}^c(\kappa)$  be an expansion coefficient, when  
4  $f(\mathbf{n}|\hat{\mathbf{z}}, \kappa)$  is expanded using spherical harmonics.

$$5 \quad f(\mathbf{n}|\hat{\mathbf{z}}, \kappa) = \sum_{l=0}^{\infty} f_{l0}^c(\kappa) Y_{l0}(\theta_{\mathbf{n}}, 0). \quad (\text{A11})$$

6 The Watson distribution  $f(\mathbf{n}|\boldsymbol{\mu}, \kappa)$ , whose mean orientation is  $\boldsymbol{\mu}$ , is expressed by using Wigner  
7 Rotation Matrix (A Morrison and A Parker, 1987) as follows:

$$\begin{aligned} 8 \\ 9 \quad f(\mathbf{n}|\boldsymbol{\mu}, \kappa) &= f(\mathbf{n}|\mathbf{R}(-\theta_{\mathbf{q}})\hat{\mathbf{z}}, \kappa) \\ 10 \quad &= \mathbf{R}(\theta_{\mathbf{q}}) f(\mathbf{n}|\hat{\mathbf{z}}, \kappa) \\ 11 \quad &= \mathbf{R}(\theta_{\mathbf{q}}) \sum_{l=0}^{\infty} f_{l0}^c(\kappa) Y_{l0}(\theta_{\mathbf{n}}, 0) \\ 12 \quad &= \sum_{l=0}^{\infty} f_{l0}^c(\kappa) \mathbf{R}(\theta_{\mathbf{q}}) Y_{l0}(\theta_{\mathbf{n}}, 0) \\ 13 \quad &= \sum_{l=0}^{\infty} f_{l0}^c(\kappa) \sum_{m'=-l}^l Y_{lm'}(\theta_{\mathbf{n}}, \phi_{\mathbf{n}}) \sqrt{\frac{4\pi}{2l+1}} Y_{lm'}^*(\theta_{\mathbf{q}}, 0), \end{aligned} \quad (\text{A12})$$

14 where  $\theta_{\mathbf{q}}$  is the angle between MPG direction and z-axis.

15

16 We substitute this into the  $A_{ic}$  (at this time  $\mathbf{q} = \hat{\mathbf{z}}$ ), because if  $m \neq 0$ ,  $\int_0^{2\pi} e^{im\phi} d\phi = 0$ , and if  
17  $m = 0$ ,  $\int_0^{2\pi} 1 d\phi = 2\pi$ .

18

$$\begin{aligned} 19 \quad A_{ic} &= \int_{\mathbb{S}^2} \sum_{l=0}^{\infty} f_{l0}^c(\kappa) \sum_{m'=-l}^l Y_{lm'}(\theta_{\mathbf{n}}, \phi_{\mathbf{n}}) \sqrt{\frac{4\pi}{2l+1}} Y_{lm'}^*(\theta_{\mathbf{q}}, 0) e^{-bd_{\parallel}(\hat{\mathbf{z}}\cdot\mathbf{n})^2} d\mathbf{n} \\ 20 \quad &= \int_{\mathbb{S}^2} \sum_{l=0}^{\infty} f_{l0}^c(\kappa) \sum_{m'=-l}^l Y_{lm'}(\theta_{\mathbf{n}}, \phi_{\mathbf{n}}) \sqrt{\frac{4\pi}{2l+1}} Y_{lm'}^*(\theta_{\mathbf{q}}, 0) e^{-bd_{\parallel}(\hat{\mathbf{z}}\cdot\mathbf{n})^2} d\mathbf{n} \\ 21 \quad &= \sum_{l=0}^{\infty} f_{l0}^c(\kappa) \sum_{m'=-l}^l \sqrt{\frac{4\pi}{2l+1}} Y_{lm'}^*(\theta_{\mathbf{q}}, 0) \int_0^{2\pi} \sin\theta_{\mathbf{n}} d\phi_{\mathbf{n}} \int_0^{\pi} d\theta_{\mathbf{n}} Y_{lm'}(\theta_{\mathbf{n}}, \phi_{\mathbf{n}}) e^{-bd_{\parallel}\cos^2\theta_{\mathbf{n}}} \\ 22 \quad &= \sum_{l=0}^{\infty} f_{l0}^c(\kappa) \sum_{m'=-l}^l \sqrt{\frac{4\pi}{2l+1}} Y_{lm'}^*(\theta_{\mathbf{q}}, 0) \int_0^{2\pi} \sin\theta_{\mathbf{n}} d\phi_{\mathbf{n}} \int_0^{\pi} d\theta_{\mathbf{n}} \sqrt{\frac{2l+1}{4\pi} \frac{(l-m')!}{(l+m')!}} P_l^{m'}(\cos\theta_{\mathbf{n}}) e^{im'\phi_{\mathbf{n}}} e^{-bd_{\parallel}\cos^2\theta_{\mathbf{n}}} \\ 23 \quad &= \sum_{l=0}^{\infty} f_{l0}^c(\kappa) \sqrt{\frac{4\pi}{2l+1}} Y_{l0}^*(\theta_{\mathbf{q}}, 0) 2\pi \int_{-1}^1 dx \sqrt{\frac{2l+1}{4\pi}} P_l(x) e^{-bd_{\parallel}x^2} \end{aligned}$$



$$1 \quad = 2\pi \sum_{l=0}^{\infty} f_{l0}^c(\kappa) \sqrt{\frac{2l+1}{4\pi}} P_l(\cos\theta_q) \int_{-1}^1 dx P_l(x) e^{-bd_{\parallel}x^2} \quad (A13)$$

2

3 On the other hand,  $f_{l0}^c(\kappa)$  are expansion coefficients, when  $f(\mathbf{n}|\hat{\mathbf{z}}, \kappa)$  is expressed using spherical  
4 harmonics.

$$5 \quad f(\mathbf{n}|\hat{\mathbf{z}}, \kappa) = \sum_{l=0}^{\infty} f_{l0}^c(\kappa) Y_{l0}(\theta_n, 0). \quad (A14)$$

6  $f_{l0}^c(\kappa)$  can be determined by multiplying  $Y_{l0}^*(\theta_n, 0)$  and integrating both sides, because of the  
7 standard orthogonality of the spherical harmonics.

$$8 \quad f_{l0}^c(\kappa) = \int Y_{l0}^* f(\mathbf{n}|\hat{\mathbf{z}}, \kappa) d\mathbf{n}$$

$$9 \quad = \int \sqrt{\frac{2l+1}{4\pi}} P_l(\cos\theta) \frac{1}{4\pi} \frac{e^{\kappa(\boldsymbol{\mu} \cdot \mathbf{n})}}{M\left(\frac{1}{2}, \frac{3}{2}, \kappa\right)} d\mathbf{n}$$

$$10 \quad = \frac{1}{4\pi} \frac{1}{M\left(\frac{1}{2}, \frac{3}{2}, \kappa\right)} \int_0^{2\pi} \sin\theta_n d\phi_n \int_0^{\pi} d\theta_n \sqrt{\frac{2l+1}{4\pi}} P_l(\cos\theta_n) e^{\kappa \cos^2\theta_n}$$

$$11 \quad = \frac{\sqrt{2l+1}}{4\sqrt{\pi} \cdot M\left(\frac{1}{2}, \frac{3}{2}, \kappa\right)} \int_{-1}^1 dx P_l(x) e^{\kappa x^2} \quad (A15)$$

12

13 Now, according to Arfken et al. (Arfken and Weber, 2005),

$$14 \quad \int_{-1}^1 P_l(\mu) e^{x\mu^2} = (x)^{l/2} \frac{\Gamma\left(\frac{l+1}{2}\right)}{\Gamma\left(\frac{2l+3}{2}\right)} M\left(\frac{l+1}{2}, \frac{2l+3}{2}, x\right). \quad (A16)$$

15 Hence,  $f_{l0}^c(\kappa)$  is expressed using Eq. (A15), (A16) as below:

$$16 \quad f_{l0}^c(\kappa) = \frac{\sqrt{2l+1}}{4\sqrt{\pi}} \frac{\Gamma\left(\frac{l+1}{2}\right)}{\Gamma\left(\frac{2l+3}{2}\right)} \frac{M\left(\frac{l+1}{2}, \frac{2l+3}{2}, \kappa\right)}{M\left(\frac{1}{2}, \frac{3}{2}, \kappa\right)} (\kappa)^{l/2}. \quad (A17)$$

17 In addition, it can be also applied for factors below, which  $A_{ic}$  contains:

$$18 \quad \int_{-1}^1 dx P_l(x) e^{-bd_{\parallel}x^2} = (-bd_{\parallel})^{l/2} \frac{\Gamma\left(\frac{l+1}{2}\right)}{\Gamma\left(\frac{2l+3}{2}\right)} M\left(\frac{l+1}{2}, \frac{2l+3}{2}, -bd_{\parallel}\right). \quad (A18)$$

19 In summary,  $A_{ic}$  is expressed using Eq. (A13), (A17), (A18) as follows:

$$\begin{aligned}
 1 \quad A_{ic} &= 2\pi \sum_{l=0}^{\infty} \frac{\sqrt{2l+1}}{4\sqrt{\pi}} \frac{\Gamma\left(\frac{l+1}{2}\right)}{\Gamma\left(\frac{2l+3}{2}\right)} \frac{M\left(\frac{l+1}{2}, \frac{2l+3}{2}, \kappa\right)}{M\left(\frac{1}{2}, \frac{3}{2}, \kappa\right)} (\kappa)^{l/2} \sqrt{\frac{2l+1}{4\pi}} P_l(\cos\theta_q) (-bd_{\parallel})^{l/2} \frac{\Gamma\left(\frac{l+1}{2}\right)}{\Gamma\left(\frac{2l+3}{2}\right)} M\left(\frac{l+1}{2}, \frac{2l+3}{2}, -bd_{\parallel}\right) \\
 2 \quad &= \frac{1}{4 \cdot M\left(\frac{1}{2}, \frac{3}{2}, \kappa\right)} \sum_{l=0}^{\infty} (2l+1) \left(\frac{\Gamma\left(\frac{l+1}{2}\right)}{\Gamma\left(\frac{2l+3}{2}\right)}\right)^2 P_l(\cos\theta_q) (-bd_{\parallel}\kappa)^{l/2} M\left(\frac{l+1}{2}, \frac{2l+3}{2}, \kappa\right) M\left(\frac{l+1}{2}, \frac{2l+3}{2}, -bd_{\parallel}\right). \quad (A19)
 \end{aligned}$$

3 Moreover, the sum of  $l$  should be performed for only the even numbers, because the symmetry of  $\theta$   
 4 direction of the Watson distribution.

5

#### 6 4. The Watson distribution

7

8 According to the original NODDI model (Zhang et al., 2012), the Watson distribution is expressed as  
 9 follows:

$$10 \quad f(\mathbf{n}) = \frac{1}{M\left(\frac{1}{2}, \frac{3}{2}, \kappa\right)} e^{\kappa(\boldsymbol{\mu} \cdot \mathbf{n})^2}, \quad (A20)$$

11 where  $M$  is the first type confluent hypergeometric function (Arfken and Weber, 2005) and is also  
 12 referred to as Kummer function. Here,  $\boldsymbol{\mu}$ ,  $\kappa$  and  $\mathbf{n}$  are denoted as the mean orientation of the  
 13 Watson distribution, concentration parameter, and the orientation of sticks in which water diffusion  
 14 is restricted, respectively. Since the Watson distribution is also a function of  $\boldsymbol{\mu}$  and  $\kappa$ , these  
 15 variables are expressed as  $f(\mathbf{n}) = f(\mathbf{n}|\boldsymbol{\mu}, \kappa)$ .

16 Let  $\boldsymbol{\mu} = \hat{\mathbf{z}}$  (unit vector in the  $z$  direction) and let  $x = \cos\theta$ ,  $dx = -\sin\theta \cdot d\theta$ , we integrate over  
 17 unit sphere  $\mathbb{S}^2$ .

$$\begin{aligned}
 18 \quad \int_{\mathbb{S}^2} f(\mathbf{n}|\hat{\mathbf{z}}, \kappa) d\mathbf{n} &= \frac{1}{M\left(\frac{1}{2}, \frac{3}{2}, \kappa\right)} \int_{\mathbb{S}^2} e^{\kappa(\hat{\mathbf{z}} \cdot \mathbf{n})^2} d\mathbf{n} \\
 19 \quad &= \frac{1}{M\left(\frac{1}{2}, \frac{3}{2}, \kappa\right)} \int_0^{2\pi} \sin\theta d\phi \int_0^{\pi} d\theta \cdot e^{\kappa(\cos\theta)^2} \\
 20 \quad &= \frac{1}{M\left(\frac{1}{2}, \frac{3}{2}, \kappa\right)} \cdot 2\pi \cdot \int_{-1}^1 e^{\kappa x^2} dx. \quad (A21)
 \end{aligned}$$

21 According to Arfken and Wever (2005),

$$22 \quad \int_{-1}^1 P_l(\mu) e^{x\mu^2} = (x)^{l/2} \frac{\Gamma\left(\frac{l+1}{2}\right)}{\Gamma\left(\frac{2l+3}{2}\right)} M\left(\frac{l+1}{2}, \frac{2l+3}{2}, x\right), \quad (A22)$$

23 where  $\Gamma(x)$  is Gamma function,  $\Gamma(1/2) = \sqrt{\pi}$ ,  $\Gamma(3/2) = \sqrt{\pi}/2$ .

24 Hence, Eq. A21 is expressed using Eq. (A22) as follows:

$$\int_{S^2} f(\mathbf{n}|\hat{\mathbf{z}}, \kappa) d\mathbf{n} = \frac{1}{M\left(\frac{1}{2}, \frac{3}{2}, \kappa\right)} \cdot 2\pi \cdot (\kappa)^{0/2} \frac{\Gamma\left(\frac{1}{2}\right)}{\Gamma\left(\frac{3}{2}\right)} M\left(\frac{1}{2}, \frac{3}{2}, \kappa\right) = 4\pi. \quad (A23)$$

Since we want to normalize the Watson distribution, we re-defined it as follows:

$$f(\mathbf{n}|\boldsymbol{\mu}, \kappa) = \frac{1}{4\pi \cdot M\left(\frac{1}{2}, \frac{3}{2}, \kappa\right)} e^{\kappa(\boldsymbol{\mu} \cdot \mathbf{n})^2}. \quad (A24)$$

5

## 6 References

- 7 A Morrison, M., and A Parker, G. (1987). A Guide to Rotations in Quantum Mechanics. *Aust. J. Phys.* 40, 465. doi:10.1071/PH870465.
- 8 Adluru, G., Gur, Y., Anderson, J. S., Richards, L. G., Adluru, N., and DiBella, E. V. R. (2014). Assessment of white matter microstructure in stroke patients using NODDI. in (IEEE), 742–745. doi:10.1109/EMBC.2014.6943697.
- 9 Arfken, G. B., and Weber, H. J. eds. (2005). “Front Matter,” in *Mathematical Methods for Physicists (6th Edition)* (Boston: Academic Press), 1200.
- 10 Assaf, Y. (2018). Imaging laminar structures in the gray matter with diffusion MRI. *NeuroImage*. doi:10.1016/j.neuroimage.2017.12.096.
- 11 Bassar, P. J., Mattiello, J., and LeBihan, D. (1994a). Estimation of the Effective Self-Diffusion Tensor from the NMR Spin Echo. *J. Magn. Reson. B* 103, 247–254. doi:10.1006/jmrb.1994.1037.
- 12 Bassar, P. J., Mattiello, J., and LeBihan, D. (1994b). MR diffusion tensor spectroscopy and imaging. *Biophys. J.* 66, 259–267. doi:10.1016/S0006-3495(94)80775-1.
- 13 Behrens, T. E. J., Woolrich, M. W., Jenkinson, M., Johansen-Berg, H., Nunes, R. G., Clare, S., et al. (2003). Characterization and propagation of uncertainty in diffusion-weighted MR imaging. *Magn. Reson. Med.* 50, 1077–1088. doi:10.1002/mrm.10609.
- 14 Billiet, T., Mädler, B., D’Arco, F., Peeters, R., Deprez, S., Plasschaert, E., et al. (2014). Characterizing the microstructural basis of “unidentified bright objects” in neurofibromatosis type 1: A combined in vivo multicomponent T2 relaxation and multi-shell diffusion MRI analysis. *NeuroImage Clin.* 4, 649–658. doi:10.1016/j.nicl.2014.04.005.
- 15 Billiet, T., Vandembulcke, M., Mädler, B., Peeters, R., Dhollander, T., Zhang, H., et al. (2015). Age-related microstructural differences quantified using myelin water imaging and advanced diffusion MRI. *Neurobiol. Aging* 36, 2107–2121. doi:10.1016/j.neurobiolaging.2015.02.029.
- 16 Bland, J. M., and Altman, D. (1986). STATISTICAL METHODS FOR ASSESSING AGREEMENT BETWEEN TWO METHODS OF CLINICAL MEASUREMENT. *The Lancet* 327,

- 1 307–310. doi:10.1016/S0140-6736(86)90837-8.
- 2 Bland, J. M., and Altman, D. G. (2003). Applying the right statistics: analyses of measurement  
3 studies. *Ultrasound Obstet. Gynecol.* 22, 85–93.
- 4 Burdette, J. H., Durden, D. D., Elster, A. D., and Yen, Y. F. (2001). High b-value diffusion-weighted  
5 MRI of normal brain. *J. Comput. Assist. Tomogr.* 25, 515–519.
- 6 Calabrese, M., Rinaldi, F., Seppi, D., Favaretto, A., Squarcina, L., Mattisi, I., et al. (2011). Cortical  
7 Diffusion-Tensor Imaging Abnormalities in Multiple Sclerosis: A 3-year Longitudinal Study.  
8 *Radiology* 261, 891–898. doi:10.1148/radiol.11110195.
- 9 Chang, Y. S., Owen, J. P., Pojman, N. J., Thieu, T., Bukshpun, P., Wakahiro, M. L. J., et al. (2015).  
10 White Matter Changes of Neurite Density and Fiber Orientation Dispersion during Human Brain  
11 Maturation. *PLOS ONE* 10, e0123656. doi:10.1371/journal.pone.0123656.
- 12 Chou, M.-C., Lin, Y.-R., Huang, T.-Y., Wang, C.-Y., Chung, H.-W., Juan, C.-J., et al. (2005).  
13 FLAIR Diffusion-Tensor MR Tractography: Comparison of Fiber Tracking with Conventional  
14 Imaging. *Am. J. Neuroradiol.* 26, 591–597.
- 15 Daducci, A., Canales-Rodríguez, E. J., Zhang, H., Dyrby, T. B., Alexander, D. C., and Thiran, J.-P.  
16 (2015). Accelerated Microstructure Imaging via Convex Optimization (AMICO) from diffusion MRI  
17 data. *NeuroImage* 105, 32–44. doi:10.1016/j.neuroimage.2014.10.026.
- 18 DeLano, M. C., Cooper, T. G., Siebert, J. E., Potchen, M. J., and Kuppusamy, K. (2000).  
19 High-b-value Diffusion-weighted MR Imaging of Adult Brain: Image Contrast and Apparent  
20 Diffusion Coefficient Map Features. *Am. J. Neuroradiol.* 21, 1830–1836.
- 21 Dowell, N. G., Bouyagoub, S., Tibble, J., Voon, V., Cercignani, M., and Harrison, N. A. (2017).  
22 Interferon-alpha-Induced Changes in NODDI Predispose to the Development of Fatigue.  
23 *Neuroscience*. doi:10.1016/j.neuroscience.2017.12.040.
- 24 Eaton-Rosen, Z., Melbourne, A., Orasanu, E., Cardoso, M. J., Modat, M., Bainbridge, A., et al.  
25 (2015). Longitudinal measurement of the developing grey matter in preterm subjects using  
26 multi-modal MRI. *NeuroImage* 111, 580–589. doi:10.1016/j.neuroimage.2015.02.010.
- 27 Edwards, L. J., Pine, K. J., Ellerbrock, I., Weiskopf, N., and Mohammadi, S. (2017). NODDI-DTI:  
28 Estimating Neurite Orientation and Dispersion Parameters from a Diffusion Tensor in Healthy White  
29 Matter. *Front. Neurosci.* 11. doi:10.3389/fnins.2017.00720.
- 30 Eustache, P., Nemmi, F., Saint-Aubert, L., Pariente, J., and Péran, P. (2016). Multimodal Magnetic  
31 Resonance Imaging in Alzheimer’s Disease Patients at Prodromal Stage. *J. Alzheimers Dis.* 50,  
32 1035–1050. doi:10.3233/JAD-150353.
- 33 Farrell, J. A. D., Landman, B. A., Jones, C. K., Smith, S. A., Prince, J. L., van Zijl, P. C. M., et al.  
34 (2007). Effects of signal-to-noise ratio on the accuracy and reproducibility of diffusion tensor

- 1 imaging-derived fractional anisotropy, mean diffusivity, and principal eigenvector measurements at  
2 1.5T. *J. Magn. Reson. Imaging* 26, 756–767. doi:10.1002/jmri.21053.
- 3 Fukutomi, H., Glasser, M. F., Zhang, H., Autio, J. A., Coalson, T. S., Okada, T., et al. (2018).  
4 Neurite imaging reveals microstructural variations in human cerebral cortical gray matter.  
5 *NeuroImage*. doi:10.1016/j.neuroimage.2018.02.017.
- 6 Genc, S., Malpas, C. B., Holland, S. K., Beare, R., and Silk, T. J. (2017). Neurite density index is  
7 sensitive to age related differences in the developing brain. *NeuroImage* 148, 373–380.  
8 doi:10.1016/j.neuroimage.2017.01.023.
- 9 Glasser, M. F., Coalson, T. S., Robinson, E. C., Hacker, C. D., Harwell, J., Yacoub, E., et al. (2016).  
10 A multi-modal parcellation of human cerebral cortex. *Nature* 536, 171–178.  
11 doi:10.1038/nature18933.
- 12 Glasser, M. F., Sotiropoulos, S. N., Wilson, J. A., Coalson, T. S., Fischl, B., Andersson, J. L., et al.  
13 (2013). The minimal preprocessing pipelines for the Human Connectome Project. *NeuroImage* 80,  
14 105–124. doi:10.1016/j.neuroimage.2013.04.127.
- 15 Glasser, M. F., and Van Essen, D. C. (2011). Mapping human cortical areas in vivo based on myelin  
16 content as revealed by T1- and T2-weighted MRI. *J. Neurosci. Off. J. Soc. Neurosci.* 31, 11597–  
17 11616. doi:10.1523/JNEUROSCI.2180-11.2011.
- 18 Gonzalezballester, M. (2002). Estimation of the partial volume effect in MRI. *Med. Image Anal.* 6,  
19 389–405. doi:10.1016/S1361-8415(02)00061-0.
- 20 Grussu, F., Schneider, T., Tur, C., Yates, R. L., Tachrount, M., Ianuș, A., et al. (2017). Neurite  
21 dispersion: a new marker of multiple sclerosis spinal cord pathology? *Ann. Clin. Transl. Neurol.* 4,  
22 663–679. doi:10.1002/acn3.445.
- 23 Henf, J., Grothe, M. J., Brueggen, K., Teipel, S., and Dyrba, M. (2018). Mean diffusivity in cortical  
24 gray matter in Alzheimer’s disease: The importance of partial volume correction. *NeuroImage Clin.*  
25 17, 579–586. doi:10.1016/j.nicl.2017.10.005.
- 26 Hui, E. S., Cheung, M. M., Chan, K. C., and Wu, E. X. (2010). B-value dependence of DTI  
27 quantitation and sensitivity in detecting neural tissue changes. *NeuroImage* 49, 2366–2374.  
28 doi:10.1016/j.neuroimage.2009.10.022.
- 29 Jelescu, I. O., Veraart, J., Fieremans, E., and Novikov, D. S. (2016). Degeneracy in model parameter  
30 estimation for multi-compartmental diffusion in neuronal tissue: Degeneracy in Model Parameter  
31 Estimation of Diffusion in Neural Tissue. *NMR Biomed.* 29, 33–47. doi:10.1002/nbm.3450.
- 32 Johansen-Berg, H., and Behrens, T. (2013). Diffusion MRI: From Quantitative Measurement to In  
33 vivo Neuroanatomy: Second Edition. 1–614.
- 34 Jones, D. K. (2004). The effect of gradient sampling schemes on measures derived from diffusion

- 1 tensor MRI: A Monte Carlo study. *Magn. Reson. Med.* 51, 807–815. doi:10.1002/mrm.20033.
- 2 Jones, D. K., and Basser, P. J. (2004). ?Squashing peanuts and smashing pumpkins?: How noise  
3 distorts diffusion-weighted MR data. *Magn. Reson. Med.* 52, 979–993. doi:10.1002/mrm.20283.
- 4 Jones, D. K., and Cercignani, M. (2010). Twenty-five pitfalls in the analysis of diffusion MRI data.  
5 *NMR Biomed.* 23, 803–820. doi:10.1002/nbm.1543.
- 6 Kaden, E., Kelm, N. D., Carson, R. P., Does, M. D., and Alexander, D. C. (2016).  
7 Multi-compartment microscopic diffusion imaging. *NeuroImage* 139, 346–359.  
8 doi:10.1016/j.neuroimage.2016.06.002.
- 9 Kodiweera, C., Alexander, A. L., Harezlak, J., McAllister, T. W., and Wu, Y.-C. (2016). Age effects  
10 and sex differences in human brain white matter of young to middle-aged adults: A DTI, NODDI,  
11 and q-space study. *NeuroImage* 128, 180–192. doi:10.1016/j.neuroimage.2015.12.033.
- 12 Kunz, N., Zhang, H., Vasung, L., O’Brien, K. R., Assaf, Y., Lazeyras, F., et al. (2014). Assessing  
13 white matter microstructure of the newborn with multi-shell diffusion MRI and biophysical  
14 compartment models. *NeuroImage* 96, 288–299. doi:10.1016/j.neuroimage.2014.03.057.
- 15 Kwong, K. K., McKinstry, R. C., Chien, D., Crawley, A. P., Pearlman, J. D., and Rosen, B. R.  
16 (1991). CSF-suppressed quantitative single-shot diffusion imaging. *Magn. Reson. Med.* 21, 157–163.  
17 doi:10.1002/mrm.1910210120.
- 18 Lampinen, B., Szczepankiewicz, F., Mårtensson, J., van Westen, D., Sundgren, P. C., and Nilsson, M.  
19 (2017). Neurite density imaging versus imaging of microscopic anisotropy in diffusion MRI: A  
20 model comparison using spherical tensor encoding. *NeuroImage* 147, 517–531.  
21 doi:10.1016/j.neuroimage.2016.11.053.
- 22 Marcus, D. S., Harms, M. P., Snyder, A. Z., Jenkinson, M., Wilson, J. A., Glasser, M. F., et al.  
23 (2013). Human Connectome Project informatics: Quality control, database services, and data  
24 visualization. *NeuroImage* 80, 202–219. doi:10.1016/j.neuroimage.2013.05.077.
- 25 Mardia, K. V., and Jupp, P. E. eds. (1990). *Directional Statistics. Wiley Series in Probability and*  
26 *Statistics.* John Wiley & Sons, Ltd.
- 27 Moseley, M. E., Cohen, Y., Kucharczyk, J., Mintorovitch, J., Asgari, H. S., Wendland, M. F., et al.  
28 (1990). Diffusion-weighted MR imaging of anisotropic water diffusion in cat central nervous system.  
29 *Radiology* 176, 439–445. doi:10.1148/radiology.176.2.2367658.
- 30 Nazeri, A., Chakravarty, M. M., Rotenberg, D. J., Rajji, T. K., Rathi, Y., Michailovich, O. V., et al.  
31 (2015). Functional Consequences of Neurite Orientation Dispersion and Density in Humans across  
32 the Adult Lifespan. *J. Neurosci.* 35, 1753–1762. doi:10.1523/JNEUROSCI.3979-14.2015.
- 33 Nazeri, A., Mulsant, B. H., Rajji, T. K., Levesque, M. L., Pipitone, J., Stefanik, L., et al. (2016).  
34 Gray Matter Neuritic Microstructure Deficits in Schizophrenia and Bipolar Disorder. *Biol.*



- 1 *Psychiatry*. doi:10.1016/j.biopsych.2016.12.005.
- 2 Panagiotaki, E., Schneider, T., Siow, B., Hall, M. G., Lythgoe, M. F., and Alexander, D. C. (2012).  
3 Compartment models of the diffusion MR signal in brain white matter: A taxonomy and comparison.  
4 *NeuroImage* 59, 2241–2254. doi:10.1016/j.neuroimage.2011.09.081.
- 5 Papadakis, N. G., Xing, D., Houston, G. C., Smith, J. M., Smith, M. I., James, M. F., et al. (1999). A  
6 study of rotationally invariant and symmetric indices of diffusion anisotropy. *Magn. Reson. Imaging*  
7 17, 881–892. doi:10.1016/S0730-725X(99)00029-6.
- 8 Pierpaoli, C., and Basser, P. J. (1996). Toward a quantitative assessment of diffusion anisotropy.  
9 *Magn. Reson. Med.* 36, 893–906. doi:10.1002/mrm.1910360612.
- 10 Pierpaoli, C., Jezzard, P., Basser, P. J., Barnett, A., and Di Chiro, G. (1996). Diffusion tensor MR  
11 imaging of the human brain. *Radiology* 201, 637–648. doi:10.1148/radiology.201.3.8939209.
- 12 Robinson, E. C., Garcia, K., Glasser, M. F., Chen, Z., Coalson, T. S., Makropoulos, A., et al. (2018).  
13 Multimodal surface matching with higher-order smoothness constraints. *NeuroImage* 167, 453–465.  
14 doi:10.1016/j.neuroimage.2017.10.037.
- 15 Robinson, E. C., Jbabdi, S., Glasser, M. F., Andersson, J., Burgess, G. C., Harms, M. P., et al. (2014).  
16 MSM: a new flexible framework for Multimodal Surface Matching☆. *NeuroImage* 100, 414.  
17 doi:10.1016/j.neuroimage.2014.05.069.
- 18 Rosenberg, G. A., Kyner, W. T., and Estrada, E. (1980). Bulk flow of brain interstitial fluid under  
19 normal and hyperosmolar conditions. *Am. J. Physiol.-Ren. Physiol.* 238, F42–F49.  
20 doi:10.1152/ajprenal.1980.238.1.F42.
- 21 Sato, K., Kerever, A., Kamagata, K., Tsuruta, K., Irie, R., Tagawa, K., et al. (2017). Understanding  
22 microstructure of the brain by comparison of neurite orientation dispersion and density imaging  
23 (NODDI) with transparent mouse brain. *Acta Radiol. Open* 6, 205846011770381.  
24 doi:10.1177/2058460117703816.
- 25 Schilling, K. G., Janve, V., Gao, Y., Stepniewska, I., Landman, B. A., and Anderson, A. W. (2018).  
26 Histological validation of diffusion MRI fiber orientation distributions and dispersion. *NeuroImage*  
27 165, 200–221. doi:10.1016/j.neuroimage.2017.10.046.
- 28 Shrout, P. E., and Fleiss, J. L. (1979). Intraclass correlations: Uses in assessing rater reliability.  
29 *Psychol. Bull.* 86, 420–428. doi:10.1037/0033-2909.86.2.420.
- 30 Song, Y., Li, X., Huang, X., Zhao, J., Zhou, X., Wang, Y., et al. (2017). A study of neurite  
31 orientation dispersion and density imaging in wilson’s disease: NODDI Application in Wilson’s  
32 Disease. *J. Magn. Reson. Imaging*. doi:10.1002/jmri.25930.
- 33 Sotiropoulos, S. N., Behrens, T. E. J., and Jbabdi, S. (2012). Ball and rackets: Inferring fiber fanning  
34 from diffusion-weighted MRI. *NeuroImage* 60, 1412–1425. doi:10.1016/j.neuroimage.2012.01.056.



- 1 Sotiropoulos, S. N., Jbabdi, S., Xu, J., Andersson, J. L., Moeller, S., Auerbach, E. J., et al. (2013).  
2 Advances in diffusion MRI acquisition and processing in the Human Connectome Project.  
3 *NeuroImage* 80, 125–143. doi:10.1016/j.neuroimage.2013.05.057.
- 4 Timmers, I., Zhang, H., Bastiani, M., Jansma, B. M., Roebroeck, A., and Rubio-Gozalbo, M. E.  
5 (2015). White matter microstructure pathology in classic galactosemia revealed by neurite  
6 orientation dispersion and density imaging. *J. Inherit. Metab. Dis.* 38, 295–304.  
7 doi:10.1007/s10545-014-9780-x.
- 8 Triarhou, L. C. ed. (2009). *Cellular Structure of the Human Cerebral Cortex: Translated and edited*  
9 *by L.C. Triarhou (Thessaloniki) Plus poster: “The 107 Cortical Cytoarchitectonic Areas of*  
10 *Constantin von Economo and Georg N. Koskinas in the Adult Human Brain.”* S. Karger AG  
11 doi:10.1159/isbn.978-3-8055-9062-4.
- 12 Vaz, S., Falkmer, T., Passmore, A. E., Parsons, R., and Andreou, P. (2013). The Case for Using the  
13 Repeatability Coefficient When Calculating Test–Retest Reliability. *PLoS ONE* 8, e73990–7.
- 14 von Economo, C., and Koskinas (1925). *Die Cytoarchitektonik der Hirnrinde des erwachsenen*  
15 *Menschen. Textband. Verlag von Julius Springer, Berlin.*
- 16 Winston, G. P., Micallef, C., Symms, M. R., Alexander, D. C., Duncan, J. S., and Zhang, H. (2014).  
17 Advanced diffusion imaging sequences could aid assessing patients with focal cortical dysplasia and  
18 epilepsy. *Epilepsy Res.* 108, 336–339. doi:10.1016/j.eplepsyres.2013.11.004.
- 19 Zhang, H., Schneider, T., Wheeler-Kingshott, C. A., and Alexander, D. C. (2012). NODDI: Practical  
20 in vivo neurite orientation dispersion and density imaging of the human brain. *NeuroImage* 61,  
21 1000–1016. doi:10.1016/j.neuroimage.2012.03.072.

22

23
